# Supplementary material for: Detecting the patient’s need for help with machine learning based on expressions
Source: Springer Nature journal article supplement (doi:10.1186/s12874-021-01502-8), 2022-03-06
Supplement: MOESM1 [file 20196246]

**Data analysis supplement to the research article "Lahti, Lauri (2022), Detecting the patient's need for help with machine learning based on expressions" to appear in the journal "BMC Medical Research Methodology" (this is Additional file 1 of that research article)**

This data analysis supplement is developed and created by Lauri Lahti, Department of Computer Science, Aalto University School of Science, Finland (email: lauri.lahti@aalto.fi), first published on 1 January 2022.

**Additional file 1**

**Supplementary Table 1. Kendall rank-correlation and cosine similarity measures for each comparable pair of parameter values of the "need for help" ratings of expression statements ES1-ES20 and the answers of the background questions BQ1 and BQ5-BQ7 (n=673).**

Kendall rank-correlation measures are shown on the upper-right region of the table and cosine similarity measures are shown on the lower-left region of the table.

Before computing cosine similarity measures the answer values of each parameter were normalized by the formula  $(x - \min(x))/(\max(x)-\min(x))$  and then these new values were shifted so that the mean value was positioned to the zero by the formula  $(x - \text{mean}(x))$ . The statistical significance levels were defined as  $p < 0,05$ ,  $p < 0,01$  and  $p < 0,001$ , denoted by symbols \*, \*\* and \*\*\*, respectively.

|      | ES1   | ES2      | ES3      | ES4      | ES5      | ES6      | ES7      | ES8      | ES9      | ES10     | ES11     | ES12     | ES13     | ES14     | ES15     | ES16     | ES17     | ES18     | ES19     | ES20      | BQ1       | BQ5       | BQ6       | BQ7       |
|------|-------|----------|----------|----------|----------|----------|----------|----------|----------|----------|----------|----------|----------|----------|----------|----------|----------|----------|----------|-----------|-----------|-----------|-----------|-----------|
| ES1  |       | 0.73 *** | 0.40 *** | 0.32 *** | 0.55 *** | 0.40 *** | 0.40 *** | 0.33 *** | 0.26 *** | 0.26 *** | 0.16 *** | 0.22 *** | 0.24 *** | 0.23 *** | 0.22 *** | 0.24 *** | 0.23 *** | 0.28 *** | 0.36 *** | 0.16 ***  | -0.01     | -0.01     | -0.03     | -0.03     |
| ES2  | 0.80  |          | 0.56 *** | 0.43 *** | 0.64 *** | 0.45 *** | 0.51 *** | 0.43 *** | 0.38 *** | 0.36 *** | 0.19 *** | 0.30 *** | 0.30 *** | 0.32 *** | 0.31 *** | 0.31 *** | 0.30 *** | 0.34 *** | 0.40 *** | 0.07 *    | 0.00      | 0.00      | -0.01     | -0.03     |
| ES3  | 0.44  | 0.65     |          | 0.67 *** | 0.52 *** | 0.34 *** | 0.56 *** | 0.55 *** | 0.51 *** | 0.51 *** | 0.20 *** | 0.40 *** | 0.34 *** | 0.51 *** | 0.52 *** | 0.43 *** | 0.43 *** | 0.43 *** | 0.41 *** | -0.13 *** | 0.03      | 0.06 *    | 0.01      | 0.01      |
| ES4  | 0.35  | 0.52     | 0.83     |          | 0.50 *** | 0.38 *** | 0.57 *** | 0.59 *** | 0.56 *** | 0.55 *** | 0.24 *** | 0.43 *** | 0.38 *** | 0.52 *** | 0.53 *** | 0.45 *** | 0.44 *** | 0.44 *** | 0.44 *** | -0.13 *** | 0.01      | 0.04      | -0.03     | -0.04     |
| ES5  | 0.60  | 0.73     | 0.62     | 0.62     |          | 0.57 *** | 0.65 *** | 0.57 *** | 0.51 *** | 0.49 *** | 0.26 *** | 0.38 *** | 0.38 *** | 0.38 *** | 0.38 *** | 0.45 *** | 0.44 *** | 0.47 *** | 0.47 *** | 0.05      | 0.02      | 0.02      | 0.01      | -0.02     |
| ES6  | 0.45  | 0.54     | 0.43     | 0.49     | 0.66     |          | 0.49 *** | 0.40 *** | 0.35 *** | 0.31 *** | 0.23 *** | 0.26 *** | 0.30 *** | 0.25 *** | 0.24 *** | 0.28 *** | 0.27 *** | 0.30 *** | 0.40 *** | 0.12 ***  | -0.11 *** | -0.10 *** | -0.11 *** | -0.11 *** |
| ES7  | 0.43  | 0.59     | 0.71     | 0.74     | 0.75     | 0.57     |          | 0.75 *** | 0.62 *** | 0.61 *** | 0.27 *** | 0.45 *** | 0.41 *** | 0.46 *** | 0.47 *** | 0.53 *** | 0.53 *** | 0.54 *** | 0.49 *** | -0.06 *   | 0.05      | 0.05      | 0.03      | -0.01     |
| ES8  | 0.33  | 0.49     | 0.73     | 0.78     | 0.65     | 0.43     | 0.87     |          | 0.67 *** | 0.64 *** | 0.28 *** | 0.47 *** | 0.45 *** | 0.49 *** | 0.51 *** | 0.55 *** | 0.55 *** | 0.54 *** | 0.46 *** | -0.13 *** | 0.08 **   | 0.07 *    | 0.04      | 0.01      |
| ES9  | 0.27  | 0.44     | 0.70     | 0.76     | 0.60     | 0.40     | 0.78     | 0.87     |          | 0.79 *** | 0.28 *** | 0.47 *** | 0.43 *** | 0.49 *** | 0.51 *** | 0.61 *** | 0.60 *** | 0.63 *** | 0.46 *** | -0.18 *** | 0.07 *    | 0.10 ***  | 0.05      | 0.02      |
| ES10 | 0.27  | 0.43     | 0.71     | 0.76     | 0.58     | 0.36     | 0.77     | 0.86     | 0.92     |          | 0.28 *** | 0.47 *** | 0.42 *** | 0.48 *** | 0.52 *** | 0.64 *** | 0.65 *** | 0.60 *** | 0.43 *** | -0.21 *** | 0.07 *    | 0.10 ***  | 0.05      | 0.02      |
| ES11 | 0.20  | 0.24     | 0.27     | 0.31     | 0.34     | 0.28     | 0.35     | 0.36     | 0.37     | 0.35     |          | 0.56 *** | 0.49 *** | 0.32 *** | 0.31 *** | 0.35 *** | 0.33 *** | 0.35 *** | 0.33 *** | 0.06 *    | -0.08 **  | -0.07 *   | -0.10 *** | -0.10 **  |
| ES12 | 0.25  | 0.37     | 0.55     | 0.58     | 0.48     | 0.33     | 0.59     | 0.64     | 0.64     | 0.63     | 0.66     |          | 0.65 *** | 0.57 *** | 0.54 *** | 0.51 *** | 0.50 *** | 0.51 *** | 0.43 *** | -0.09 **  | 0.01      | 0.01      | -0.02     | -0.05     |
| ES13 | 0.27  | 0.36     | 0.46     | 0.51     | 0.46     | 0.37     | 0.52     | 0.58     | 0.57     | 0.55     | 0.60     | 0.77     |          | 0.51 *** | 0.49 *** | 0.49 *** | 0.47 *** | 0.50 *** | 0.47 *** | -0.02     | 0.00      | 0.01      | -0.02     | -0.04     |
| ES14 | 0.27  | 0.41     | 0.69     | 0.70     | 0.49     | 0.34     | 0.62     | 0.69     | 0.69     | 0.68     | 0.38     | 0.69     | 0.62     |          | 0.86 *** | 0.51 *** | 0.49 *** | 0.50 *** | 0.42 *** | -0.16 *** | 0.02      | 0.04      | 0.00      | -0.04     |
| ES15 | 0.26  | 0.38     | 0.70     | 0.69     | 0.48     | 0.30     | 0.63     | 0.71     | 0.71     | 0.71     | 0.36     | 0.67     | 0.60     | 0.95     |          | 0.54 *** | 0.52 *** | 0.52 *** | 0.40 *** | -0.18 *** | 0.04      | 0.05      | 0.01      | -0.02     |
| ES16 | 0.27  | 0.39     | 0.60     | 0.64     | 0.55     | 0.35     | 0.68     | 0.75     | 0.79     | 0.80     | 0.44     | 0.66     | 0.62     | 0.70     | 0.72     |          | 0.91 *** | 0.78 *** | 0.50 *** | -0.14 *** | 0.04      | 0.07 *    | 0.02      | -0.01     |
| ES17 | 0.26  | 0.39     | 0.62     | 0.65     | 0.55     | 0.35     | 0.69     | 0.77     | 0.81     | 0.82     | 0.42     | 0.66     | 0.61     | 0.70     | 0.71     | 0.97     |          | 0.77 *** | 0.49 *** | -0.15 *** | 0.05      | 0.07 *    | 0.02      | -0.01     |
| ES18 | 0.31  | 0.41     | 0.58     | 0.61     | 0.57     | 0.37     | 0.67     | 0.72     | 0.78     | 0.75     | 0.44     | 0.65     | 0.63     | 0.67     | 0.68     | 0.90     | 0.89     |          | 0.58 *** | -0.07 *   | 0.04      | 0.06      | 0.02      | -0.02     |
| ES19 | 0.43  | 0.48     | 0.53     | 0.57     | 0.57     | 0.50     | 0.59     | 0.58     | 0.58     | 0.55     | 0.42     | 0.55     | 0.58     | 0.55     | 0.52     | 0.62     | 0.62     | 0.70     |          | 0.03      | -0.06     | -0.05     | -0.07 *   | -0.08 **  |
| ES20 | 0.13  | -0.01    | -0.31    | -0.35    | -0.06    | 0.04     | -0.23    | -0.36    | -0.40    | -0.42    | -0.02    | -0.24    | -0.17    | -0.36    | -0.37    | -0.36    | -0.36    | -0.28    | -0.15    |           | -0.01     | -0.05     | 0.00      | -0.02     |
| BQ1  | 0.00  | 0.01     | 0.03     | -0.04    | 0.03     | -0.15    | 0.08     | 0.11     | 0.10     | 0.09     | -0.09    | 0.01     | 0.01     | 0.00     | 0.04     | 0.05     | 0.07     | 0.06     | -0.08    | 0.03      |           | 0.63 ***  | 0.71 ***  | 0.57 ***  |
| BQ5  | -0.03 | 0.00     | 0.08     | 0.02     | -0.11    | 0.08     | 0.11     | 0.13     | 0.12     | -0.09    | 0.02     | 0.02     | 0.03     | 0.05     | 0.09     | 0.10     | 0.09     | -0.05    | -0.01    | 0.75      |           | 0.68 ***  | 0.58 ***  | 0.58 ***  |
| BQ6  | -0.04 | -0.02    | 0.00     | -0.08    | 0.00     | -0.15    | 0.04     | 0.07     | 0.06     | 0.05     | -0.11    | -0.02    | -0.02    | -0.02    | 0.01     | 0.03     | 0.03     | 0.03     | -0.11    | 0.04      | 0.82      |           | 0.80      | 0.63 ***  |
| BQ7  | -0.03 | -0.03    | 0.01     | -0.09    | -0.01    | -0.15    | 0.00     | 0.03     | 0.03     | 0.03     | -0.10    | -0.05    | -0.04    | -0.07    | -0.02    | 0.00     | 0.00     | 0.00     | -0.11    | 0.02      | 0.70      | 0.71      | 0.77      |           |









**Supplementary Table 7. Guidance texts of the online questionnaire.**

Gathering the "need for help" ratings for expression statements with an online questionnaire is illustrated in the following Supplementary Figure 1.

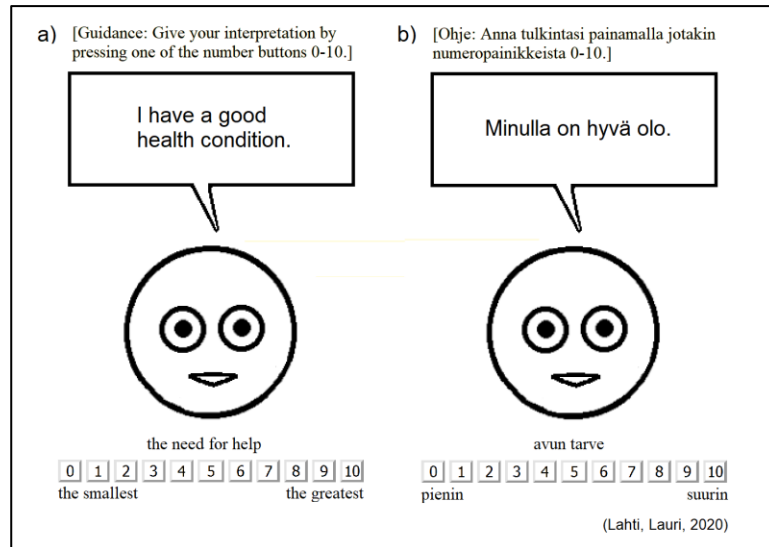

*Supplementary Figure 1.* Gathering the "need for help" rating for an expression statement on an 11-point Likert scale with an online questionnaire, shown here translated from Finnish to English (a) and in original formulation in Finnish (b).

Before the online questionnaire started to collect actual answers, the person was provided with the following guidance texts about how he/she should perform the interpretation tasks: "We ask you to evaluate different expressions, for example the expression 'I am happy'. Interpret how much each expression tells about the need for help. Give your interpretation about the expression on a numeric scale 0-10. 0 indicates the smallest possible need for help and 10 indicates the greatest possible need for help."

In Finnish: "Pyydämme sinua arvioimaan erilaisia ilmaisuja, esimerkiksi ilmaisua 'olen iloinen'. Tulkitse, kuinka paljon kukin ilmaisu kertoo avun tarpeesta. Anna tulkintasi ilmaisusta numeroasteikolla 0-10. 0 tarkoittaa mahdollisimman pientä avun tarvetta ja 10 tarkoittaa mahdollisimman suurta avun tarvetta."

Then a small training phase allowed the person to get accustomed to give the "need for help" ratings by rating three expression statements: "I have a good health condition.", "I have a bad health condition." and "I have an ordinary health condition."

In Finnish: "Minulla on hyvä olo.", "Minulla on huono olo." and "Minulla on tavallinen olo."

The answers that the person gave during the training phase were excluded from the data set that we use in the analysis reported in this our current research article.

After the training phase, the person was provided with the following guidance texts to still further clarify how he/she should perform the interpretation tasks: "Do not interpret how much the expression tells about just your own situation. Instead, interpret what kind of impression this expression induces in you. Thus give your interpretation about the expression's meaning in respect to the mentioned property."

In Finnish: "Älä tulkitse, kuinka paljon ilmaisu kertoo juuri sinun omasta tilanteestasi. Sen sijaan tulkitse, minkälaisen vaikutelman tämä ilmaisu herättää sinussa. Siis anna tulkintasi ilmaisun merkityksestä suhteessa mainittuun ominaisuuteen."

After showing those guidance texts, the person was allowed to start giving actual questionnaire answers, i.e. to perform the actual interpretation tasks.

**Supplementary Table 8. Expression statements (ES) concerning the coronavirus COVID-19 epidemic that were rated by the person in respect to the impression about the "need for help".**

| Compact notation | Expression statement                                                                                                       | Expression statement in Finnish                                                                   | Range of values for the person's answer (indicating the "need for help" rating) |
|------------------|----------------------------------------------------------------------------------------------------------------------------|---------------------------------------------------------------------------------------------------|---------------------------------------------------------------------------------|
| ES1              | "I have a flu."                                                                                                            | "Minulla on nuhaa."                                                                               | 0-10                                                                            |
| ES2              | "I have a cough."                                                                                                          | "Minulla on yskää."                                                                               | 0-10                                                                            |
| ES3              | "I have a shortness of breath."                                                                                            | "Minulla on hengenahdistusta."                                                                    | 0-10                                                                            |
| ES4              | "My health condition is weakening."                                                                                        | "Yleistilani heikkenee."                                                                          | 0-10                                                                            |
| ES5              | "I have a sore throat."                                                                                                    | "Minulla on kurkkukipua."                                                                         | 0-10                                                                            |
| ES6              | "I have muscular ache."                                                                                                    | "Minulla on lihassärkyä."                                                                         | 0-10                                                                            |
| ES7              | "I have a fever."                                                                                                          | "Minulla on kuumetta."                                                                            | 0-10                                                                            |
| ES8              | "A sudden fever rises for me with 38 degrees of Celsius or more."                                                          | "Minulle nousee äkillinen kuume, joka on 38 astetta Celsiusta tai enemmän."                       | 0-10                                                                            |
| ES9              | "I suspect that I have now become infected by the coronavirus."                                                            | "Epäilen, että olen nyt sairastunut koronavirukseen."                                             | 0-10                                                                            |
| ES10             | "I have now become infected by the coronavirus."                                                                           | "Olen nyt sairastunut koronavirukseen."                                                           | 0-10                                                                            |
| ES11             | "I am quarantined from meeting other people ordinarily so that the spreading of an infectious disease could be prevented." | "Olen eristettynä ihmisten tavanomaiselta tapaamiselta, jotta tartuntataudin leviäminen estyisi." | 0-10                                                                            |
| ES12             | "I must be inside a house without getting out."                                                                            | "Joudun olemaan talon sisällä ilman ulospääsyä."                                                  | 0-10                                                                            |
| ES13             | "I must be without a human companion."                                                                                     | "Joudun olemaan ilman ihmisseuraa."                                                               | 0-10                                                                            |
| ES14             | "I do not cope in everyday life independently without getting help from other persons."                                    | "En pärjää arkielämässä itsenäisesti ilman avun saamista muilta henkilöiltä."                     | 0-10                                                                            |
| ES15             | "I do not cope at home independently without getting help from persons who originate outside of my home."                  | "En pärjää kotona itsenäisesti ilman avun saamista kotini ulkopuolisilta henkilöiltä."            | 0-10                                                                            |
| ES16             | "I have an infectious disease."                                                                                            | "Minulla on tartuntatauti."                                                                       | 0-10                                                                            |
| ES17             | "I have an infectious disease that has been verified by a doctor."                                                         | "Minulla on tartuntatauti, jonka lääkäri on varmistanut."                                         | 0-10                                                                            |
| ES18             | "I suspect that I have an infectious disease."                                                                             | "Epäilen, että minulla on tartuntatauti."                                                         | 0-10                                                                            |
| ES19             | "I have a bad health condition."                                                                                           | "Minulla on huono olo."                                                                           | 0-10                                                                            |
| ES20             | "I have an ordinary health condition."                                                                                     | "Minulla on tavallinen olo."                                                                      | 0-10                                                                            |

**Supplementary Table 9. Background questions (BQ) presented to the person.**

| Compact notation                                       | Question about the person's background information                                                                                                                                                                                                                                                                                                                                                                                               | Question about the person's background information in Finnish                                                                                                                                                                                                                                                                                                           | Range of values for the person's answer                                                                                                                                                                                                                                                                                    | Range of values for the person's answer in Finnish                                                                                                                                                                                                                                                                                                             |
|--------------------------------------------------------|--------------------------------------------------------------------------------------------------------------------------------------------------------------------------------------------------------------------------------------------------------------------------------------------------------------------------------------------------------------------------------------------------------------------------------------------------|-------------------------------------------------------------------------------------------------------------------------------------------------------------------------------------------------------------------------------------------------------------------------------------------------------------------------------------------------------------------------|----------------------------------------------------------------------------------------------------------------------------------------------------------------------------------------------------------------------------------------------------------------------------------------------------------------------------|----------------------------------------------------------------------------------------------------------------------------------------------------------------------------------------------------------------------------------------------------------------------------------------------------------------------------------------------------------------|
| BQ1: an estimated health condition                     | "What kind of health condition you have currently according to your opinion?" (de Bruin et al., 1996; Koskinen et al., 2012)                                                                                                                                                                                                                                                                                                                     | "Minkälainen terveydentilasi on mielestäsi nykyisin?" (de Bruin et al., 1996; Koskinen et al., 2012)                                                                                                                                                                                                                                                                    | A 9-point Likert scale supplied with the following partial labeling: "9 Good", "8 -", "7 Rather good", "6 -", "5 Medium", "4 -", "3 Rather bad", "2 -", "1 Bad".                                                                                                                                                           | A 9-point Likert scale supplied with the following partial labeling: "9 Hyvä", "8 -", "7 Melko hyvä", "6 -", "5 Keskitasoinen", "4 -", "3 Melko huono", "2 -", "1 Huono".                                                                                                                                                                                      |
| BQ2: a health problem reduces ability                  | "Do you have a permanent or long-lasting disease or such deficit, ailment or disability that reduces your ability to work or to perform your daily living activities? Here the question refers to all long-lasting diseases identified by a doctor, and also to such ailments not identified by a doctor which have lasted at least three months but which affect your ability to perform your daily living activities." (Koskinen et al., 2012) | "Onko sinulla jokin pysyvä tai pitkäaikainen sairaus tai jokin sellainen vika, vaiva tai vamma, joka vähentää työ- tai toimintakykyäsi? Tässä tarkoitetaan kaikkia lääkäriin totesmia pitkäaikaisia sairauksia sekä myös vähintään kolme kuukautta kestäneitä vaivoja, joita lääkäri ei ole todennut, mutta jotka vaikuttavat toimintakykyysi." (Koskinen et al., 2012) | No or yes                                                                                                                                                                                                                                                                                                                  | Ei or kyllä.                                                                                                                                                                                                                                                                                                                                                   |
| BQ3: one or more diseases identified by a doctor       | "Has there been a situation that a doctor has identified in you one or several of the following diseases?" (Koskinen et al., 2012)                                                                                                                                                                                                                                                                                                               | "Onko lääkäri joskus todennut sinulla jonkin/joitakin seuraavista sairauksista?" (Koskinen et al., 2012)                                                                                                                                                                                                                                                                | The person answers by selecting one or more options from a list of diseases (Koskinen et al., 2012), see Data analysis supplement (Additional file 1). For some options there is a question "other, what?" and an adjacent text input box so that the person can write some additional information concerning that option. | Henkilö vastaa valitsemalla yhden tai useampia vaihtoehtoja sairauksia sisältävästä luettelosta (Koskinen et al., 2012), katso Data analysis supplement (Additional file 1). Joidenkin vaihtoehtojen kohdalla on kysymys "muu, mikä?" ja sen vieressä tekstin syöttämislaitteko, johon henkilö voi kirjoittaa täydentävää tietoa koskien kyseistä vaihtoehtoa. |
| BQ4: a continuous or repeated need for a doctor's care | "Do you need continuously or repeatedly care given by a doctor for a long-lasting disease, deficit or disability that you have just mentioned?" (Koskinen et al., 2012)                                                                                                                                                                                                                                                                          | "Tarvitsetko jatkuvasti tai toistuvasti lääkinhoitoa jonkin äsken mainitsemasi pitkäaikaisen sairauden, vian tai vamman takia?" (Koskinen et al., 2012)                                                                                                                                                                                                                 | No or yes                                                                                                                                                                                                                                                                                                                  | En or kyllä.                                                                                                                                                                                                                                                                                                                                                   |
| BQ5: the quality of life                               | "How would you rate your quality of life? Give your estimate based on the latest two weeks." (Nosikov & Gudex 2003; Aalto et al., 2013)                                                                                                                                                                                                                                                                                                          | "Minkälaiseksi arvioit elämäntilausi? Anna arviosi viimeisimpien kahden viikon ajalta." (Nosikov & Gudex 2003; Aalto et al., 2013)                                                                                                                                                                                                                                      | A 9-point Likert scale supplied with the following partial labeling: "9 Very good", "8 -", "7 Good", "6 -", "5 Neither good nor bad", "4 -", "3 Bad", "2 -", "1 Very bad".                                                                                                                                                 | A 9-point Likert scale supplied with the following partial labeling: "9 Erittäin hyväksi", "8 -", "7 Hyväksi", "6 -", "5 Ei hyväksi eikä huonoksi", "4 -", "3 Huonoksi", "2 -", "1 Erittäin huonoksi".                                                                                                                                                         |
| BQ6: the satisfaction about health                     | "How satisfied are you with your health? Give your estimate based on the latest two weeks." (Nosikov & Gudex 2003; Aalto et al., 2013)                                                                                                                                                                                                                                                                                                           | "Kuinka tyytyväinen olet terveyteesi? Anna arviosi viimeisimpien kahden viikon ajalta." (Nosikov & Gudex 2003; Aalto et al., 2013)                                                                                                                                                                                                                                      | A 9-point Likert scale supplied with the following partial labeling: "9 Very satisfied", "8 -", "7 Satisfied", "6 -", "5 Neither satisfied nor dissatisfied", "4 -", "3 Dissatisfied", "2 -", "1 Very dissatisfied".                                                                                                       | A 9-point Likert scale supplied with the following partial labeling: "9 Erittäin tyytyväinen", "8 -", "7 Tyytyväinen", "6 -", "5 Ei tyytyväinen eikä tyytymätön", "4 -", "3 Tyytymätön", "2 -", "1 Erittäin tyytymätön".                                                                                                                                       |
| BQ7: the satisfaction about ability                    | "How satisfied are you with your ability to perform your daily living activities? Give your estimate based on the latest two weeks." (Nosikov & Gudex 2003; Aalto et al., 2013)                                                                                                                                                                                                                                                                  | "Kuinka tyytyväinen olet kykyysi selviytyä päivittäisistä toiminnoistasi? Anna arviosi viimeisimpien kahden viikon ajalta." (Nosikov & Gudex 2003; Aalto et al., 2013)                                                                                                                                                                                                  | A 9-point Likert scale supplied with the following partial labeling: "9 Very satisfied", "8 -", "7 Satisfied", "6 -", "5 Neither satisfied nor dissatisfied", "4 -", "3 Dissatisfied", "2 -", "1 Very dissatisfied".                                                                                                       | A 9-point Likert scale supplied with the following partial labeling: "9 Erittäin tyytyväinen", "8 -", "7 Tyytyväinen", "6 -", "5 Ei tyytyväinen eikä tyytymätön", "4 -", "3 Tyytymätön", "2 -", "1 Erittäin tyytymätön".                                                                                                                                       |
| BQ8: the sex                                           | "Tell what is your sex. The answer alternatives are similar as in the earlier health surveys of Finnish Institute for Health and Welfare (THL) to maintain comparability with the earlier results." (Koskinen et al., 2012)                                                                                                                                                                                                                      | "Kerro sukupuolesi. Vastausvaihtoehdot ovat samankaltaiset kuin aiemmissa THL:n terveytystutkimuksissa, jotta säilyisi vertailtavuus aiempiin tuloksiin." (Koskinen et al., 2012)                                                                                                                                                                                       | Man or woman                                                                                                                                                                                                                                                                                                               | Mies or nainen.                                                                                                                                                                                                                                                                                                                                                |
| BQ9: the age                                           | "Tell what is your age." (Koskinen et al., 2012)                                                                                                                                                                                                                                                                                                                                                                                                 | "Kerro ikäsi." (Koskinen et al., 2012)                                                                                                                                                                                                                                                                                                                                  | Age in years selected from the following range: 16 years, 17 years, ..., 99 years, 100 years or more                                                                                                                                                                                                                       | Age in years selected from the following range: 16 vuotta, 17 vuotta, ..., 99 vuotta, 100 vuotta tai enemmän.                                                                                                                                                                                                                                                  |

**Supplementary Table 10. Background question BQ3.**

| Compact notation                                 | Question about the person's background information                                                                                | Question about the person's background information in Finnish                                           | Range of values for the person's answer                                                                                                                                                                                                                                                                                    | Range of values for the person's answer in Finnish                                                                                                                                                                                                                                                                                                             |
|--------------------------------------------------|-----------------------------------------------------------------------------------------------------------------------------------|---------------------------------------------------------------------------------------------------------|----------------------------------------------------------------------------------------------------------------------------------------------------------------------------------------------------------------------------------------------------------------------------------------------------------------------------|----------------------------------------------------------------------------------------------------------------------------------------------------------------------------------------------------------------------------------------------------------------------------------------------------------------------------------------------------------------|
| BQ3: one or more diseases identified by a doctor | "Has there been a situation that a doctor has identified in you one or several of the following diseases?" (Koskinen et al. 2012) | "Onko lääkäri joskus todennut sinulla jonkin/joitakin seuraavista sairauksista?" (Koskinen et al. 2012) | The person answers by selecting one or more options from a list of diseases (Koskinen et al., 2012), see Data analysis supplement (Additional file 1). For some options there is a question "other, what?" and an adjacent text input box so that the person can write some additional information concerning that option. | Henkilö vastaa valitsemalla yhden tai useampia vaihtoehtoja sairauksia sisältävästä luettelosta (Koskinen et al., 2012), katso Data analysis supplement (Additional file 1). Joidenkin vaihtoehtojen kohdalla on kysymys "muu, mikä?" ja sen vieressä tekstin syöttämislaatikko, johon henkilö voi kirjoittaa täydentävää tietoa koskien kyseistä vaihtoehtoa. |

The person was asked to indicate if a doctor had identified one or more diseases in him/her and to describe them (BQ3) (in a form adapted from Koskinen et al., 2012).

| Questions about one or more diseases identified by a doctor (in a form adapted from Koskinen et al., 2012)                                                                                                                                                                                                                                                                                                                                                                                                                                                                                                                                                                                                                                                                                                                                                                                                                                                                                                                                                                                                                                                                                                                                                                                                                                                                                                                                                                                                                                                                                                                                                                                                                                                                                                                                                                                                                                                                                                                                                                                                                                                                                                                                                                                                                                                                                                                                                                                                                                                                                                                                                                                                                                                                                                                                                                                                                                                                                                                                                                                                                                                                                                                                                                                                                                                                                                                                                   | Questions about one or more diseases identified by a doctor in Finnish (in a form adapted from Koskinen et al., 2012)                                                                                                                                                                                                                                                                                                                                                                                                                                                                                                                                                                                                                                                                                                                                                                                                                                                                                                                                                                                                                                                                                                                                                                                                                                                                                                                                                                                                                                                                                                                                                                                                                                                                                                                                                                                                                                                                                                                                                                                                                                                                                                                                                                                                                                                                                                                                                                                                                                                                                                                                                                                                                                                                                                                                                                                                                                                                                                                                                                                                                            |
|--------------------------------------------------------------------------------------------------------------------------------------------------------------------------------------------------------------------------------------------------------------------------------------------------------------------------------------------------------------------------------------------------------------------------------------------------------------------------------------------------------------------------------------------------------------------------------------------------------------------------------------------------------------------------------------------------------------------------------------------------------------------------------------------------------------------------------------------------------------------------------------------------------------------------------------------------------------------------------------------------------------------------------------------------------------------------------------------------------------------------------------------------------------------------------------------------------------------------------------------------------------------------------------------------------------------------------------------------------------------------------------------------------------------------------------------------------------------------------------------------------------------------------------------------------------------------------------------------------------------------------------------------------------------------------------------------------------------------------------------------------------------------------------------------------------------------------------------------------------------------------------------------------------------------------------------------------------------------------------------------------------------------------------------------------------------------------------------------------------------------------------------------------------------------------------------------------------------------------------------------------------------------------------------------------------------------------------------------------------------------------------------------------------------------------------------------------------------------------------------------------------------------------------------------------------------------------------------------------------------------------------------------------------------------------------------------------------------------------------------------------------------------------------------------------------------------------------------------------------------------------------------------------------------------------------------------------------------------------------------------------------------------------------------------------------------------------------------------------------------------------------------------------------------------------------------------------------------------------------------------------------------------------------------------------------------------------------------------------------------------------------------------------------------------------------------------------------|--------------------------------------------------------------------------------------------------------------------------------------------------------------------------------------------------------------------------------------------------------------------------------------------------------------------------------------------------------------------------------------------------------------------------------------------------------------------------------------------------------------------------------------------------------------------------------------------------------------------------------------------------------------------------------------------------------------------------------------------------------------------------------------------------------------------------------------------------------------------------------------------------------------------------------------------------------------------------------------------------------------------------------------------------------------------------------------------------------------------------------------------------------------------------------------------------------------------------------------------------------------------------------------------------------------------------------------------------------------------------------------------------------------------------------------------------------------------------------------------------------------------------------------------------------------------------------------------------------------------------------------------------------------------------------------------------------------------------------------------------------------------------------------------------------------------------------------------------------------------------------------------------------------------------------------------------------------------------------------------------------------------------------------------------------------------------------------------------------------------------------------------------------------------------------------------------------------------------------------------------------------------------------------------------------------------------------------------------------------------------------------------------------------------------------------------------------------------------------------------------------------------------------------------------------------------------------------------------------------------------------------------------------------------------------------------------------------------------------------------------------------------------------------------------------------------------------------------------------------------------------------------------------------------------------------------------------------------------------------------------------------------------------------------------------------------------------------------------------------------------------------------------|
| <p>Has there been a situation that a doctor has identified in you one or several of the following diseases?</p> <p>Select all diseases that belong to your response in the following way:<br/>Click the square that is on the left side of the name of the disease and then a check mark emerges in it. You can remove the selection with a new click.<br/>If needed, answer to the questions "other, what?" in the following way: Click the box that is besides the question and write your answer into it.</p> <p>Finally, press the button "I save my response and continue forward".</p> <p><b>LUNG DISEASES</b></p> <p><input type="checkbox"/> 1. asthma<br/><input type="checkbox"/> 2. chronic obstructive pulmonary disease (COPD)<br/><input type="checkbox"/> 3. inflammation of the bronchi (chronic bronchitis, lung catarrh)</p> <p><b>HEART AND CIRCULATORY DISEASES</b></p> <p><input type="checkbox"/> 4. heart attack, i.e., myocardial infarction<br/><input type="checkbox"/> 5. coronary artery disease (atherosclerosis, angina pectoris)<br/><input type="checkbox"/> 6. congestive heart failure<br/><input type="checkbox"/> 7. high blood pressure, hypertension<br/><input type="checkbox"/> 8. stroke (intracranial hemorrhage, cerebral infarction)</p> <p><b>JOINT AND BACK DISEASES</b></p> <p><input type="checkbox"/> 9. rheumatoid arthritis<br/><input type="checkbox"/> 10. arthrosis (osteoarthritis)<br/>10.a. If you answered to the question 10 yes, in which joints it has been identified?<br/>You can select several answer alternatives.<br/><input type="checkbox"/> 10.1. knee<br/><input type="checkbox"/> 10.2. pelvis<br/><input type="checkbox"/> 10.3. hand<br/><input type="checkbox"/> 10.4. spine<br/><input type="checkbox"/> 10.5. other, what? [_____]<br/><input type="checkbox"/> 11. back disease or other back deficit<br/><input type="checkbox"/> 12. neck disease or other neck deficit</p> <p><b>INJURIES</b></p> <p><input type="checkbox"/> 13. permanent disability caused by an injury<br/>13.a. If you answered to the question 13 yes, a what kind of permanent disability is it?<br/>You can select several answer alternatives.<br/><input type="checkbox"/> 13.1. face or jaw injury<br/><input type="checkbox"/> 13.2. some other head or brain injury<br/><input type="checkbox"/> 13.3. visual impairment<br/><input type="checkbox"/> 13.4. hearing impairment<br/><input type="checkbox"/> 13.5. trauma in an upper limb or limbs<br/><input type="checkbox"/> 13.6. pelvis fracture or its consequence<br/><input type="checkbox"/> 13.7. some other trauma in a lower limb or limbs<br/><input type="checkbox"/> 13.8. trauma in the body or back<br/><input type="checkbox"/> 13.9. lung injury<br/><input type="checkbox"/> 13.10. some other injury, what? [_____]</p> <p><b>MENTAL HEALTH PROBLEMS</b></p> <p><input type="checkbox"/> 14. psychic or mental health-related disease<br/>14.a. If you answered to the question 14 yes, a what kind of disease is it?<br/>You can select several answer alternatives.<br/><input type="checkbox"/> 14.1. psychosis<br/><input type="checkbox"/> 14.2. depression<br/><input type="checkbox"/> 14.3. anxiety<br/><input type="checkbox"/> 14.4. substance abuse problem<br/><input type="checkbox"/> 14.5. other, what? [_____]</p> <p><b>VISION AND HEARING DEFICITS</b></p> <p><input type="checkbox"/> 15. cataract</p> | <p>Onko lääkäri joskus todennut sinulla jonkin/joitakin seuraavista sairauksista?</p> <p>Valitse kaikki vastaukseesi kuuluvat sairaudet seuraavasti:<br/>Napauta sairauden nimen vasemmallä puolella olevaa ruutua, jolloin siihen ilmestyy valintamerkki. Voit poistaa valinnan uudella napautuksella.<br/>Tarvittaessa vastaa kysymyksiin "muu, mikä?" seuraavasti: Napauta kysymyksen vieressä näkyvää laatikkoa ja kirjoita siihen vastauksesi.</p> <p>Lopuksi paina painiketta "Tallenna vastaukseni ja jatka eteenpäin".</p> <p><b>KEUHKOSAIRAUDET</b></p> <p><input type="checkbox"/> 1. astma<br/><input type="checkbox"/> 2. keuhkoputkien ahtaus (COPD)<br/><input type="checkbox"/> 3. krooninen keuhkoputkentulehdus (krooninen bronkiitti, keuhkogatarr)</p> <p><b>SYDÄN- JA VERISUONISAIRAUDET</b></p> <p><input type="checkbox"/> 4. sydänveritulppa eli sydäninfarkti<br/><input type="checkbox"/> 5. sepelvaltimotauti (sepelvaltimoiden ahtaus, angina pectoris)<br/><input type="checkbox"/> 6. sydämen vajaatoiminta<br/><input type="checkbox"/> 7. kohonnut verenpaine, verenpainetauti<br/><input type="checkbox"/> 8. aivohalvaus (aivoverenvuoto, aivotulppa)</p> <p><b>NIVEL- JA SELKÄSAIRAUDET</b></p> <p><input type="checkbox"/> 9. nivelreuma<br/><input type="checkbox"/> 10. nivelkulumä (nivelrikko)<br/>10.a. Jos vastasit kysymykseen 10 kyllä, missä nivelissä se on todettu?<br/>Voit valita useamman vastausvaihtoehdon.<br/><input type="checkbox"/> polvi<br/><input type="checkbox"/> lonkka<br/><input type="checkbox"/> käsi<br/><input type="checkbox"/> ranka<br/><input type="checkbox"/> muu, mikä? [_____]<br/><input type="checkbox"/> 11. selkäsairaus tai muu selkävika<br/><input type="checkbox"/> 12. niskasairaus tai muu niskavika</p> <p><b>TAPATURMAT</b></p> <p><input type="checkbox"/> 13. tapaturman aiheuttama pysyvä vamma<br/>13.a. Jos vastasit kysymykseen 13 kyllä, minkälainen pysyvä vamma on kyseessä?<br/>Voit valita useamman vastausvaihtoehdon.<br/><input type="checkbox"/> kasvo- tai leukavamma<br/><input type="checkbox"/> jokin muu pää- tai aivovamma<br/><input type="checkbox"/> näkövamma<br/><input type="checkbox"/> kuulovamma<br/><input type="checkbox"/> vamma yläraajassa/-raajoissa<br/><input type="checkbox"/> lonkkamurtuma tai sen jälkitila<br/><input type="checkbox"/> jokin muu vamma alaraajassa/-raajoissa<br/><input type="checkbox"/> vamma vartalossa tai selässä<br/><input type="checkbox"/> keuhkovamma<br/><input type="checkbox"/> jokin muu vamma, mikä? [_____]</p> <p><b>MIELENTERVEYDEN ONGELMAT</b></p> <p><input type="checkbox"/> 14. psyykinen tai mielenterveyteen liittyvä sairaus<br/>14.a. Jos vastasit kysymykseen 14 kyllä, minkälainen sairaus on kyseessä?<br/>Voit valita useamman vastausvaihtoehdon.<br/><input type="checkbox"/> psykoosi<br/><input type="checkbox"/> masennus<br/><input type="checkbox"/> ahdistus<br/><input type="checkbox"/> päihdeongelma<br/><input type="checkbox"/> muu, mikä? [_____]</p> <p><b>NÄKÖ- JA KUULOVIAT</b></p> <p><input type="checkbox"/> 15. silmien harmaakaihi</p> |



|                                                                                                                                                                                                                                                                                                                                                                                                                                                                                                                                                                                                                                                                                                                                                                                                                                                                                                                                                                                                                                                                                 |                                                                                                                                                                                                                                                                                                                                                                                                                                                                                                                                                                                                                                                                                                                                                                                                                                                                                                                                                                                                             |
|---------------------------------------------------------------------------------------------------------------------------------------------------------------------------------------------------------------------------------------------------------------------------------------------------------------------------------------------------------------------------------------------------------------------------------------------------------------------------------------------------------------------------------------------------------------------------------------------------------------------------------------------------------------------------------------------------------------------------------------------------------------------------------------------------------------------------------------------------------------------------------------------------------------------------------------------------------------------------------------------------------------------------------------------------------------------------------|-------------------------------------------------------------------------------------------------------------------------------------------------------------------------------------------------------------------------------------------------------------------------------------------------------------------------------------------------------------------------------------------------------------------------------------------------------------------------------------------------------------------------------------------------------------------------------------------------------------------------------------------------------------------------------------------------------------------------------------------------------------------------------------------------------------------------------------------------------------------------------------------------------------------------------------------------------------------------------------------------------------|
| <p>15a. If you answered to the question 15 yes, have you been in an eye surgery due to it?</p> <p><input type="checkbox"/> Yes I have.</p> <p><input type="checkbox"/> 16. glaucoma (ocular hypertension, glaucoma disease)</p> <p><input type="checkbox"/> 17. macular degeneration</p> <p><input type="checkbox"/> 18. hearing deficit, hearing disability or disease that weakens hearing</p> <p>OTHER DISEASES</p> <p><input type="checkbox"/> 19. diabetes (diabetes mellitus)</p> <p><input type="checkbox"/> 20. cancer disease (malignant tumor)</p> <p><input type="checkbox"/> 21. Parkinson's disease</p> <p><input type="checkbox"/> 22. involuntary urination, leakage of urine or urinary incontinence</p> <p>23. Do you have still some other long-lasting disease, deficit, ailment or disability that a doctor has identified in you?</p> <p><input type="checkbox"/> Yes I have.</p> <p><input type="checkbox"/> 23a. If you answered to the question 23 yes, this other thing is what? [ _____ ]</p> <p>Button "I save my response and continue forward"</p> | <p>15a. Jos vastasit kysymykseen 15 kyllä, oletko ollut sen takia silmäleikkauksessa?</p> <p><input type="checkbox"/> Kyllä olen.</p> <p><input type="checkbox"/> 16. silmien glaukooma (silmänpaine tauti, viherkaihi)</p> <p><input type="checkbox"/> 17. silmänpohjan rappeuma</p> <p><input type="checkbox"/> 18. kuulovika, kuulovamma tai kuuloa heikentävä sairaus</p> <p>MUUT SAIRAUDET</p> <p><input type="checkbox"/> 19. diabetes (sokeritauti)</p> <p><input type="checkbox"/> 20. syöpätauti (pahanlaatuinen kasvain)</p> <p><input type="checkbox"/> 21. Parkinsonintauti</p> <p><input type="checkbox"/> 22. virtsan pidättämisen vaikeuksia, virtsan karkailua tai inkontinenssi</p> <p>23. Onko sinulla vielä jokin muu lääkärin toteama pitkäaikainen sairaus, vika, vaiva tai vamma?</p> <p><input type="checkbox"/> Kyllä on.</p> <p><input type="checkbox"/> 23a. Jos vastasit kysymykseen 23 kyllä, mikä muu? [ _____ ]</p> <p>Painike "Tallenna vastaukseni ja jatkan eteenpäin"</p> |
|---------------------------------------------------------------------------------------------------------------------------------------------------------------------------------------------------------------------------------------------------------------------------------------------------------------------------------------------------------------------------------------------------------------------------------------------------------------------------------------------------------------------------------------------------------------------------------------------------------------------------------------------------------------------------------------------------------------------------------------------------------------------------------------------------------------------------------------------------------------------------------------------------------------------------------------------------------------------------------------------------------------------------------------------------------------------------------|-------------------------------------------------------------------------------------------------------------------------------------------------------------------------------------------------------------------------------------------------------------------------------------------------------------------------------------------------------------------------------------------------------------------------------------------------------------------------------------------------------------------------------------------------------------------------------------------------------------------------------------------------------------------------------------------------------------------------------------------------------------------------------------------------------------------------------------------------------------------------------------------------------------------------------------------------------------------------------------------------------------|

**Supplementary Table 11. Animation of the face figure that is shown together with the expression statements in the online questionnaire.**

The online questionnaire shows each expression statement as a speech bubble and below that an animation of a face figure is shown. The animation is based on 18 image frames that are illustrated in this table. The animation is defined to present the frames 1-18 with the speed of 10 frames per second. In the end, the last frame 18 remains permanently displayed, thus there is no looping of the animation.

|                                                                                                  |                                                                                                     |                                                                                                  |                                                                                                   |
|--------------------------------------------------------------------------------------------------|-----------------------------------------------------------------------------------------------------|--------------------------------------------------------------------------------------------------|---------------------------------------------------------------------------------------------------|
| Frames 1-5:<br> | Frame 6:<br>       | Frame 7:<br>    | Frames 8-10:<br> |
| Frame 11:<br>  | Frames 12-13:<br> | Frame 14:<br>  | Frame 15:<br>   |
| Frame 16:<br> | Frame 17:<br>    | Frame 18:<br> | In the end, the last frame 18 remains permanently displayed.<br>(Lahti, Lauri, 2020)              |
