# Supplementary material for: Detecting the patient’s need for help with machine learning based on expressions
Source: BMC Med Res Methodol. 2022 Mar 6;22:60. doi: 10.1186/s12874-021-01502-8 (PMC8898191; doi:10.1186/s12874-021-01502-8)
Supplement: Supplementary file 2 — Additional file 2. [file 12874_2021_1502_MOESM2_ESM.xlsx]

## Sheet: Sheet1
Open access data set "Need for help related to the coronavirus COVID-19 epidemic" collected and prepared by Lauri Lahti, Department of Computer Science, Aalto University School of Science, Finland (email: lauri.lahti@aalto.fi). This data set is first published on 1 January 2022 as a supplement to the research article "Lahti, Lauri (2022), Detecting the patient’s need for help with machine learnin…
person	ES1	ES2	ES3	ES4	ES5	ES6	ES7	ES8	ES9	ES10	ES11	ES12	ES13	ES14	ES15	ES16	ES17	ES18	ES19	ES20	BQ1	BQ2	BQ4	BQ5	BQ6	BQ7	BQ8	BQ9
anonym001	3	7	10	6	8	4	5	4	6	10	10	9	3	10	10	6	7	4	3	0	7	1	1	8	6	6	2	41
anonym002	8	2	1	6	3	1	2	2	0	0	2	0	0	2	1	0	0	0	4	5	5	2	1	3	3	5	2	17
anonym003	2	4	10	7	3	3	5	7	8	9	2	4	4	9	8	6	6	5	4	2	8	2	1	7	9	9	2	17
anonym004	2	3	6	5	2	3	4	6	6	6	3	4	5	4	5	5	6	3	2	0	8	2	1	8	7	9	2	17
anonym005	3	4	1	2	3	2	0	0	0	0	4	7	1	8	7	0	0	0	2	5	7	2	1	6	7	7	2	16
anonym006	1	2	7	7	2	3	4	6	2	1	4	4	6	8	8	6	7	6	3	3	8	2	1	7	8	6	2	17
anonym007	4	6	8	7	4	4	9	9	8	9	7	3	7	10	9	8	9	4	5	2	8	1	1	7	7	8	2	18
anonym008	1	1	3	1	0	0	0	0	0	0	2	0	0	0	1	0	0	0	0	5	9	1	1	7	9	8	2	17
anonym009	2	3	6	7	4	4	7	8	6	7	5	9	5	10	10	6	6	5	3	3	8	2	1	8	8	9	2	17
anonym010	3	4	7	6	5	5	6	8	8	9	1	4	5	7	7	8	9	7	7	3	7	1	1	7	8	9	1	17
anonym011	1	5	9	10	4	1	6	8	9	10	1	6	6	9	9	10	10	7	4	0	9	1	1	9	9	9	2	17
anonym012	0	1	5	7	1	1	5	8	8	8	5	5	3	0	1	5	7	5	2	0	7	2	1	8	7	7	1	33
anonym013	6	5	0	0	2	0	0	0	1	0	0	0	0	0	0	0	1	1	1	8	9	1	1	7	7	7	2	18
anonym014	4	4	5	7	4	5	5	6	6	7	7	8	8	8	9	5	5	4	3	2	9	1	1	9	9	9	1	18
anonym015	5	5	10	9	6	7	8	8	4	9	3	7	6	8	8	10	10	5	3	2	4	2	1	7	5	4	2	18
anonym016	1	1	1	1	1	1	1	1	1	1	1	1	1	1	1	1	1	1	1	6	8	1	1	8	8	8	2	47
anonym017	7	8	10	10	9	4	9	10	9	10	2	8	6	10	10	6	8	6	3	2	8	1	1	7	8	8	2	16
anonym018	2	2	1	2	2	2	2	1	1	1	3	2	2	2	3	1	1	1	1	9	9	1	1	8	9	8	2	18
anonym019	2	3	8	7	4	7	5	8	8	10	3	5	5	9	9	10	7	8	6	5	8	1	1	7	8	7	2	17
anonym020	2	3	8	9	4	5	5	8	8	9	3	4	0	8	8	5	6	3	3	0	8	2	2	7	7	7	2	53
anonym021	3	4	9	9	3	3	3	5	9	10	2	4	3	9	9	7	7	4	3	0	8	2	1	6	6	7	2	18
anonym022	4	4	0	3	0	5	0	0	0	0	6	1	0	6	0	0	0	2	5	5	6	2	2	7	7	4	2	18
anonym023	2	5	7	8	7	2	3	9	9	9	8	8	9	9	9	6	8	3	4	0	4	2	1	3	4	7	2	18
anonym024	1	0	0	0	0	1	0	0	0	0	0	0	0	0	0	0	0	0	0	10	9	1	1	7	9	9	2	18
anonym025	6	5	8	7	5	3	7	9	7	8	4	4	6	7	7	5	6	4	7	5	6	1	1	8	8	6	2	18
anonym026	1	2	5	6	3	3	2	7	7	6	1	3	5	6	8	6	6	4	1	0	7	1	1	7	8	5	1	17
anonym027	1	2	4	2	1	1	2	4	6	8	0	1	1	3	4	6	8	4	5	4	6	1	1	6	6	7	2	17
anonym028	0	0	0	0	0	0	0	0	0	0	4	3	3	0	1	0	0	0	0	0	7	1	1	6	7	9	2	19
anonym029	3	5	8	7	4	7	3	8	9	10	3	7	8	10	10	8	8	8	7	4	6	2	1	7	8	9	2	17
anonym030	1	1	4	4	1	3	4	6	6	8	2	5	6	6	7	6	7	5	2	0	6	1	1	7	6	9	2	17
anonym031	8	8	2	2	5	6	2	0	0	0	8	5	1	0	0	0	0	0	0	8	6	1	1	5	6	9	1	19
anonym032	3	5	7	7	4	3	5	7	3	2	1	6	4	9	9	3	4	4	4	6	7	2	1	7	3	6	2	18
anonym033	1	0	0	0	0	0	0	0	0	0	7	0	0	0	0	0	0	0	0	7	7	1	1	7	5	7	2	18
anonym034	5	7	9	10	3	6	9	10	10	10	2	4	5	7	8	9	8	5	4	1	9	1	1	9	9	9	1	17
anonym035	3	5	3	0	1	0	0	0	0	0	2	0	0	2	0	0	0	0	0	6	8	2	1	8	8	8	2	18
anonym036	5	3	4	2	1	0	0	0	0	0	5	3	0	0	0	0	0	0	0	5	8	1	1	7	8	8	2	16
anonym037	10	3	3	5	3	6	0	0	0	0	10	4	5	5	2	0	0	0	4	5	5	2	1	6	5	7	2	17
anonym038	2	2	5	4	1	2	4	5	6	8	1	3	4	6	8	4	5	3	4	0	9	1	1	6	8	8	2	17
anonym039	3	5	7	7	2	6	4	8	10	10	2	7	7	8	8	5	7	3	4	0	5	1	1	6	7	9	1	17
anonym040	3	4	8	8	3	5	7	8	8	8	5	8	7	8	8	6	7	5	4	5	6	1	1	7	7	9	2	18
anonym041	1	0	0	0	0	1	0	0	0	0	1	0	0	0	0	0	0	0	0	8	9	1	1	9	9	9	2	17
anonym042	3	3	6	7	2	1	5	9	8	8	1	5	6	8	7	3	2	5	6	0	7	2	2	7	6	8	2	17
anonym043	2	2	6	6	2	2	3	5	7	7	4	4	5	7	6	5	6	4	2	2	7	2	1	9	8	9	2	19
anonym044	3	3	4	4	3	3	4	6	6	8	5	7	7	10	10	7	7	5	7	5	9	1	1	8	8	6	2	18
anonym045	2	3	8	7	3	2	3	8	4	7	3	4	5	6	7	5	6	4	4	0	7	1	1	9	8	8	2	17
anonym046	0	2	4	7	2	4	4	7	10	10	7	9	9	10	10	10	10	8	7	1	9	1	1	8	9	7	2	18
anonym047	5	8	10	10	7	3	4	9	10	10	3	7	6	9	8	9	10	7	7	5	7	1	1	7	5	6	2	16
anonym048	4	6	8	7	3	3	7	8	8	9	3	7	7	8	8	7	8	6	6	4	6	1	1	7	7	8	2	19
anonym049	4	7	8	8	7	6	8	10	10	10	2	4	8	9	9	10	10	9	8	1	9	1	1	9	8	9	2	18
anonym050	3	4	7	9	1	1	6	6	7	7	4	8	7	10	10	6	6	5	6	0	8	1	1	8	8	7	2	16
anonym051	6	6	8	8	6	5	5	7	6	7	3	5	3	9	8	6	7	5	5	0	8	2	2	7	8	9	2	16
anonym052	7	7	8	8	6	6	8	9	10	10	5	6	6	9	5	7	8	7	8	5	7	2	1	4	4	5	2	17
anonym053	6	6	8	9	6	7	7	7	9	10	4	7	5	8	8	8	7	8	6	5	7	1	1	8	8	9	2	17
anonym054	2	0	3	3	1	1	3	6	3	4	0	0	1	0	0	1	1	1	1	0	5	1	1	6	4	7	1	18
anonym055	7	6	4	2	2	4	0	0	2	0	6	2	5	0	0	0	0	3	6	1	4	2	2	5	4	6	2	17
anonym056	0	1	9	10	2	4	4	8	10	10	0	2	3	8	9	10	10	8	5	3	9	1	1	7	7	8	1	17
anonym057	1	4	8	7	2	7	4	5	5	5	0	9	7	9	9	2	2	2	4	0	7	1	1	8	8	9	1	18
anonym058	6	7	9	8	4	2	7	10	3	10	0	2	1	4	6	7	9	2	7	3	9	2	1	9	9	9	1	17
anonym059	2	6	10	10	8	10	9	10	10	10	8	9	10	10	10	9	9	7	8	4	5	2	2	7	4	7	2	52
anonym060	2	3	6	8	3	3	5	7	8	8	5	7	6	8	8	6	6	5	6	4	9	1	1	8	8	9	2	17
anonym061	0	0	0	0	0	0	0	0	0	0	6	0	0	0	0	0	0	0	0	0	9	1	1	9	9	9	2	16
anonym062	6	5	8	9	7	7	8	8	10	10	5	7	7	8	8	9	10	8	6	3	8	2	1	7	8	8	2	18
anonym063	4	4	0	1	0	0	0	0	0	0	0	0	0	0	0	0	0	0	0	8	7	1	1	7	7	8	2	17
anonym064	1	1	1	1	1	1	1	2	1	0	1	1	1	1	1	0	0	0	0	3	7	2	2	7	7	7	2	58
anonym065	2	0	0	0	0	0	0	0	0	0	0	0	0	0	0	0	0	0	7	5	7	1	1	6	6	9	1	17
anonym066	0	1	6	8	2	2	2	5	10	10	4	6	5	9	9	7	7	7	5	1	9	1	1	9	9	9	2	17
anonym067	1	1	4	6	3	4	4	7	7	7	2	2	2	4	6	5	7	4	4	2	7	1	1	7	7	7	2	19
anonym068	4	6	9	7	4	4	5	9	8	8	2	6	7	10	10	3	4	3	3	0	6	1	1	6	3	6	2	17
anonym069	1	1	7	8	2	2	4	4	8	9	0	1	1	8	9	1	2	2	2	1	9	1	1	9	9	9	2	52
anonym070	2	3	5	7	3	4	8	9	1	2	1	7	7	10	10	1	1	1	1	1	9	1	1	7	8	9	2	38
anonym071	3	4	9	8	7	0	0	0	4	4	0	10	7	5	5	2	3	2	7	0	7	1	1	7	7	9	1	19
anonym072	2	3	9	7	2	6	6	8	8	9	2	4	7	9	10	9	10	6	4	1	8	1	1	7	7	7	2	17
anonym073	3	4	9	8	3	6	8	9	5	4	3	8	1	9	9	2	6	4	3	2	9	1	2	9	9	9	2	18
anonym074	2	2	6	7	3	3	5	7	7	8	8	7	9	9	9	5	5	3	5	3	9	1	1	7	8	9	2	18
anonym075	0	1	0	9	6	8	9	10	10	10	6	1	1	1	1	8	9	4	4	0	7	2	1	8	8	9	2	56
anonym076	6	7	9	8	7	8	8	8	9	10	3	4	3	8	9	9	8	7	6	5	4	2	2	6	3	3	1	18
anonym077	4	2	7	8	4	4	8	8	8	8	2	2	6	10	10	5	5	6	7	4	7	1	2	7	7	9	2	17
anonym078	6	7	9	8	8	8	8	8	9	9	3	2	7	8	8	7	8	7	7	5	4	2	2	4	3	6	1	18
anonym079	3	4	8	10	3	4	7	7	10	10	6	4	4	8	8	3	4	3	4	0	5	1	1	5	5	7	2	52
anonym080	2	3	9	10	3	1	4	4	5	8	0	0	0	5	5	3	3	2	1	1	8	1	1	7	8	8	1	34
anonym081	4	6	8	9	7	6	7	9	10	10	2	4	4	8	8	6	6	4	7	0	7	1	1	7	8	8	1	17
anonym082	3	3	8	4	2	3	3	4	8	9	2	7	8	9	9	7	8	5	4	1	7	1	2	8	7	8	2	17
anonym083	1	1	8	9	1	1	1	6	3	4	0	3	3	10	10	0	0	0	3	1	9	1	1	9	9	9	2	17
anonym084	3	5	10	7	6	3	9	10	8	10	0	10	5	10	10	8	9	7	6	2	9	1	2	7	7	9	2	17
anonym085	4	4	6	8	4	5	6	8	9	10	6	7	7	8	8	7	8	6	3	3	9	1	1	8	9	9	2	18
anonym086	2	3	7	8	3	6	7	9	9	10	9	9	8	9	10	8	9	6	4	1	7	2	2	6	4	6	1	58
anonym087	1	1	4	4	1	1	2	3	2	2	1	3	4	8	8	3	3	3	2	2	8	1	1	8	8	8	2	18
anonym088	2	1	10	10	4	7	6	9	10	4	0	8	4	8	6	5	7	3	2	4	8	2	1	7	7	9	1	18
anonym089	8	7	9	9	6	7	9	10	9	10	3	6	7	9	10	5	6	3	5	2	9	1	1	8	8	8	2	17
anonym090	0	2	6	8	2	4	3	4	7	7	6	7	7	8	8	3	4	2	1	0	7	2	1	6	7	9	2	18
anonym091	3	3	5	7	3	4	6	8	10	10	0	1	3	10	10	6	7	8	5	2	8	1	1	7	6	9	2	16
anonym092	1	2	7	7	1	1	3	9	9	10	2	2	3	2	2	3	8	5	3	0	9	1	1	9	8	9	2	17
anonym093	1	1	1	2	0	2	0	0	0	0	2	1	1	0	0	0	0	0	1	7	7	2	1	7	7	8	1	62
anonym094	4	2	7	6	1	3	4	6	5	7	0	1	4	5	6	7	8	5	4	0	8	1	1	8	6	8	2	17
anonym095	2	1	6	8	2	3	5	6	8	9	1	2	2	8	8	5	6	4	7	0	6	1	1	5	4	8	1	18
anonym096	2	3	4	5	3	3	4	4	6	8	3	3	2	7	6	7	7	8	3	0	8	1	2	8	8	9	1	18
anonym097	4	4	7	6	2	3	5	6	4	5	2	4	5	9	9	3	3	2	2	2	9	1	1	7	8	9	2	16
anonym098	0	0	1	7	0	0	0	0	0	0	9	2	0	10	10	0	0	0	0	7	6	2	2	1	3	2	2	18
anonym099	0	2	7	6	4	0	5	8	10	10	0	0	0	1	1	6	7	6	2	0	8	1	1	8	9	3	1	18
anonym100	7	8	10	10	8	6	4	10	8	10	6	8	4	9	10	3	4	3	6	1	8	2	2	9	7	9	2	40
anonym101	2	4	7	8	5	4	7	8	9	9	7	7	7	10	10	5	5	5	2	5	8	1	1	7	8	8	2	19
anonym102	5	6	8	9	5	5	7	6	9	8	8	8	2	0	0	5	6	7	4	2	5	2	2	5	3	4	2	44
anonym103	0	0	5	8	0	1	2	4	5	6	3	5	3	10	10	5	8	5	0	0	8	1	1	8	4	3	2	55
anonym104	2	3	5	7	2	3	2	4	6	5	3	6	6	4	4	6	6	5	2	1	5	1	1	4	4	5	2	17
anonym105	8	2	4	2	3	1	0	0	0	0	5	5	5	8	8	9	9	9	8	3	4	2	1	5	3	7	2	60
anonym106	3	4	7	6	3	2	4	7	5	5	1	1	2	5	5	2	2	1	3	1	9	1	1	8	8	9	2	42
anonym107	1	2	9	8	5	7	4	8	8	8	5	6	7	10	10	8	9	6	2	0	9	1	2	8	8	9	2	17
anonym108	6	6	8	9	3	4	4	7	9	9	2	3	5	8	8	7	6	7	7	2	9	1	1	8	8	8	2	19
anonym109	3	3	9	10	4	6	5	9	7	8	2	4	5	7	8	5	6	4	5	1	9	1	1	7	7	9	1	16
anonym110	2	2	6	9	2	2	2	6	7	7	1	2	2	7	8	2	2	2	5	1	9	2	1	8	8	9	2	54
anonym111	2	5	8	6	3	4	8	9	10	10	1	2	2	5	5	6	7	4	3	0	5	2	2	6	5	3	2	16
anonym112	1	1	4	5	1	2	2	5	7	8	3	4	4	7	8	8	8	7	4	1	8	1	1	8	7	9	2	18
anonym113	3	2	8	6	5	5	6	7	9	10	3	1	4	9	9	7	8	6	5	3	9	1	1	8	7	8	2	16
anonym114	2	0	0	0	0	10	0	0	0	0	2	1	0	0	0	0	1	0	0	10	9	1	1	9	9	9	2	16
anonym115	2	2	7	8	1	1	1	8	8	8	5	8	9	10	10	4	7	5	3	1	9	1	1	9	9	9	2	18
anonym116	4	5	8	9	3	4	4	8	10	10	1	4	2	9	10	8	8	7	5	0	8	2	2	8	7	8	2	47
anonym117	1	2	3	9	1	2	2	5	8	10	3	7	10	10	9	4	4	3	3	1	9	1	1	9	9	8	2	17
anonym118	4	4	7	7	4	6	4	5	6	5	3	9	7	8	9	4	2	3	4	1	4	2	1	6	5	7	1	17
anonym119	3	3	9	10	3	4	6	10	6	7	3	5	4	8	9	9	9	9	5	3	7	1	1	7	5	8	2	41
anonym120	1	2	6	7	3	4	5	9	6	7	2	3	1	10	10	7	7	4	4	2	8	1	1	7	8	9	2	38
anonym121	1	2	9	8	2	2	2	7	5	4	2	4	5	6	7	4	4	6	4	0	8	1	1	7	6	8	2	16
anonym122	1	2	5	7	2	1	2	6	7	7	0	0	0	7	7	3	3	2	4	0	7	2	2	9	7	8	1	17
anonym123	1	2	6	6	1	4	2	8	4	5	2	3	5	6	8	5	4	2	4	0	6	2	2	6	6	7	2	17
anonym124	3	3	10	8	2	3	5	7	9	10	0	5	1	10	10	8	8	7	8	1	9	1	1	9	9	9	2	16
anonym125	3	4	5	7	5	6	8	8	9	10	1	3	5	8	8	9	8	8	8	5	7	2	1	5	7	8	2	18
anonym126	4	3	8	9	3	6	6	9	5	5	7	8	8	8	9	5	4	7	10	5	5	2	1	7	8	9	2	17
anonym127	7	8	9	9	7	6	9	9	10	10	2	8	9	10	10	10	10	8	6	3	8	1	2	8	8	8	2	18
anonym128	4	3	6	7	5	6	6	7	7	8	1	2	8	9	9	6	7	4	4	0	6	1	1	6	7	8	1	19
anonym129	0	0	0	0	0	0	0	0	0	0	0	0	0	1	1	0	0	0	0	0	6	1	1	5	7	7	1	18
anonym130	6	6	8	7	5	5	7	7	7	8	7	9	8	10	10	5	5	4	4	2	7	2	1	3	5	3	2	32
anonym131	3	3	5	5	2	3	4	7	7	8	2	6	3	10	10	5	6	4	2	2	9	1	1	9	9	9	2	18
anonym132	4	4	7	8	5	5	6	8	7	8	2	3	5	10	10	4	7	5	4	3	4	2	1	5	4	7	2	18
anonym133	6	6	8	9	6	4	9	9	8	10	3	8	4	4	4	9	10	6	4	2	9	1	1	8	8	8	2	52
anonym134	2	1	4	5	1	4	5	7	9	10	3	5	6	9	10	10	10	8	2	0	8	1	1	8	8	8	2	18
anonym135	4	5	7	9	5	6	6	10	8	9	2	4	6	8	9	8	9	7	5	3	8	1	1	6	7	7	2	18
anonym136	5	5	8	9	5	4	6	9	7	7	6	6	8	10	10	6	7	5	3	2	7	1	1	7	6	9	2	18
anonym137	2	3	5	5	2	1	2	3	4	3	2	4	5	7	6	5	6	4	4	2	9	1	1	9	8	9	2	19
anonym138	0	3	8	6	2	1	3	2	4	4	0	2	4	6	7	0	0	0	0	0	9	1	1	5	8	7	2	17
anonym139	2	3	7	7	3	6	5	8	9	9	4	6	6	8	10	9	10	9	3	1	7	1	1	6	5	7	2	18
anonym140	2	2	9	9	2	3	3	5	5	7	3	4	3	6	6	5	5	6	5	3	8	2	1	7	7	8	2	47
anonym141	2	2	3	3	3	2	0	0	0	0	4	0	1	0	0	0	0	0	2	8	7	1	1	8	5	9	1	18
anonym142	3	2	8	8	4	4	7	9	9	3	4	7	5	8	8	8	8	5	3	2	7	1	1	6	7	8	2	46
anonym143	1	3	7	8	2	2	3	6	5	6	4	4	4	7	8	4	4	3	3	2	8	1	1	8	8	9	2	45
anonym144	0	1	6	8	1	2	3	5	7	8	7	7	7	9	9	9	9	7	5	2	8	1	1	8	7	9	2	57
anonym145	2	7	10	10	8	8	8	10	7	8	8	8	8	10	10	5	5	3	8	0	3	2	2	4	2	6	2	47
anonym146	5	7	10	9	5	8	7	10	10	8	7	8	10	10	10	6	6	8	7	4	6	2	1	4	5	6	2	27
anonym147	1	1	1	3	1	1	1	1	3	1	5	7	8	10	10	9	9	4	4	2	5	2	2	6	4	4	2	61
anonym148	1	0	1	1	0	0	0	0	0	0	5	1	0	0	0	0	0	0	0	0	7	2	2	7	7	7	1	68
anonym149	0	0	3	0	0	7	0	0	0	0	7	10	10	10	10	10	10	9	8	5	4	2	2	5	3	6	2	64
anonym150	1	3	5	8	4	3	4	9	8	8	3	1	1	1	1	0	0	0	0	8	5	2	1	5	5	5	2	62
anonym151	3	7	7	1	0	0	0	0	0	0	3	0	0	5	5	0	0	0	0	8	3	2	2	6	5	7	2	54
anonym152	0	1	8	8	1	2	5	7	8	8	6	6	4	8	8	8	8	6	6	0	8	2	2	9	8	9	2	65
anonym153	2	5	8	8	6	5	5	8	9	9	8	9	5	9	8	7	7	8	5	1	6	2	2	7	6	7	2	54
anonym154	0	0	1	3	0	3	0	0	0	0	2	0	0	0	0	0	0	0	2	5	4	2	1	5	3	7	1	48
anonym155	6	6	6	4	0	7	2	0	0	0	10	6	10	0	0	0	0	0	10	2	3	2	2	1	1	1	1	36
anonym156	3	5	8	10	3	5	4	7	10	10	9	9	3	10	10	8	10	7	3	0	4	2	2	3	3	5	2	40
anonym157	0	1	4	8	6	6	9	10	10	10	5	7	6	10	10	10	10	9	6	3	9	2	1	9	8	9	2	57
anonym158	3	3	8	8	1	2	5	8	8	8	4	7	9	10	10	4	6	3	3	0	7	2	2	8	4	4	2	37
anonym159	6	6	7	8	7	7	8	9	10	10	8	8	9	9	9	9	9	9	6	3	7	2	2	7	7	7	2	46
anonym160	5	7	8	9	7	7	9	9	10	10	8	8	8	8	8	9	9	9	7	6	5	2	1	5	3	7	1	16
anonym161	1	1	2	7	4	3	3	9	10	10	0	0	0	7	0	6	6	9	7	0	9	1	1	7	9	9	1	16
anonym162	6	5	8	9	7	7	9	10	10	9	7	9	7	10	9	7	9	5	6	5	9	1	1	7	8	9	2	16
anonym163	6	6	8	9	6	6	8	10	9	10	8	10	10	10	10	9	9	7	6	2	8	1	1	7	5	9	2	16
anonym164	0	0	0	0	0	0	0	0	0	0	5	5	5	0	0	0	0	0	0	5	8	1	2	8	8	8	1	17
anonym165	7	7	9	6	0	0	0	0	0	0	7	0	2	0	0	0	0	0	0	10	7	2	1	8	4	9	2	18
anonym166	2	2	4	5	3	4	3	7	8	10	3	3	5	8	9	8	8	6	6	0	4	2	1	6	4	9	2	16
anonym167	5	8	10	8	5	5	7	10	10	10	5	7	9	10	10	10	7	9	7	2	7	1	1	7	6	8	2	18
anonym168	6	6	8	7	5	4	5	6	6	6	5	6	6	8	8	5	5	5	6	4	9	1	1	7	8	8	2	17
anonym169	3	4	6	6	4	4	3	3	8	9	2	4	5	6	7	5	6	4	2	0	8	2	1	7	7	7	1	17
anonym170	1	1	2	2	2	2	1	2	3	3	0	0	0	0	0	10	10	9	1	0	9	1	1	9	9	9	2	89
anonym171	1	0	1	0	0	1	0	0	0	0	0	0	0	1	0	0	0	0	0	8	8	2	1	7	9	9	2	16
anonym172	5	3	7	9	4	7	5	10	10	10	3	5	7	10	10	5	7	6	8	0	7	2	1	8	7	8	2	17
anonym173	1	1	8	6	1	4	4	4	9	10	5	8	2	8	5	10	10	5	1	0	5	2	2	7	5	7	2	51
anonym174	0	0	0	0	0	2	0	0	0	0	0	0	0	0	0	0	0	0	0	10	9	1	1	9	9	9	2	16
anonym175	3	4	7	7	5	6	6	8	8	10	4	6	6	7	7	8	9	6	5	0	8	1	1	7	7	8	2	16
anonym176	1	3	10	8	3	4	6	8	9	7	0	6	8	10	7	5	8	8	5	0	4	2	2	5	6	6	1	18
anonym177	0	0	0	0	0	1	0	0	0	0	0	0	0	0	0	0	0	0	0	0	9	1	1	8	8	9	2	16
anonym178	1	1	7	6	2	4	8	9	8	10	9	6	8	10	10	5	6	3	5	2	5	2	2	6	6	8	2	25
anonym179	0	0	0	0	0	7	0	0	0	0	6	0	0	0	0	0	0	0	0	8	8	1	1	5	6	9	2	68
anonym180	0	0	3	5	2	2	3	3	7	7	1	0	0	5	5	5	5	2	3	0	9	1	1	6	7	9	1	18
anonym181	0	2	2	2	0	5	1	0	2	0	5	0	10	9	3	0	0	1	7	3	4	2	2	3	3	3	2	50
anonym182	3	2	5	10	2	10	2	1	0	0	0	0	0	0	0	0	0	0	5	4	1	2	2	5	1	5	2	16
anonym183	6	6	4	9	2	7	1	0	0	0	1	0	0	0	0	0	0	0	2	4	4	2	2	5	3	6	2	22
anonym184	1	2	7	10	3	4	8	10	8	9	1	8	7	10	9	2	2	1	1	0	8	2	1	7	7	7	2	43
anonym185	1	1	7	5	1	2	5	7	8	8	5	9	4	9	10	2	4	1	1	0	8	2	1	9	9	9	2	17
anonym186	2	2	1	3	3	3	4	8	7	9	3	3	3	4	5	9	10	4	1	1	9	2	1	8	8	9	2	65
anonym187	6	6	10	10	5	6	7	8	6	6	8	9	7	10	10	9	9	7	7	2	5	2	2	6	5	6	2	38
anonym188	2	5	7	9	3	6	8	9	10	10	3	6	5	8	9	10	10	10	9	1	5	2	2	5	5	4	2	72
anonym189	0	0	0	0	0	0	0	0	0	0	0	0	0	0	0	0	0	0	0	0	8	2	2	9	8	9	2	56
anonym190	6	5	6	5	6	6	1	1	1	1	5	1	1	1	1	1	1	1	6	1	3	2	2	3	3	3	1	65
anonym191	0	1	4	8	5	5	0	0	0	0	1	1	1	4	4	0	0	0	8	4	4	2	2	4	3	3	2	18
anonym192	3	3	9	9	2	3	7	7	7	9	6	8	8	9	9	8	8	7	7	1	8	2	2	8	8	9	2	43
anonym193	1	1	5	7	1	2	2	6	8	10	9	9	8	10	10	8	9	8	6	0	1	2	2	2	1	3	2	53
anonym194	1	0	0	0	0	1	0	0	0	1	7	0	1	0	0	0	0	0	1	2	7	2	1	5	7	7	2	54
anonym195	3	3	8	7	3	2	5	7	9	10	1	2	2	10	10	8	9	7	2	0	8	2	1	9	9	9	2	36
anonym196	0	0	0	0	0	1	0	0	0	0	0	0	0	0	0	0	0	0	0	8	7	2	2	5	5	4	1	61
anonym197	3	4	8	9	3	4	5	8	9	10	3	4	5	4	5	6	6	7	3	1	7	2	1	6	7	7	2	37
anonym198	6	7	9	8	3	6	7	8	6	5	6	8	7	9	9	5	6	8	7	2	7	2	1	6	7	6	2	31
anonym199	5	6	9	9	5	6	7	8	9	9	7	9	9	10	10	8	8	5	7	0	9	1	1	9	9	9	2	34
anonym200	5	6	9	9	7	6	8	9	8	9	8	9	8	10	10	8	9	7	6	5	8	1	1	6	6	8	2	35
anonym201	4	6	8	9	6	6	7	8	8	9	7	7	8	8	8	7	7	6	7	5	7	2	2	7	7	7	2	45
anonym202	0	0	0	0	0	6	0	0	0	0	7	0	5	0	0	0	0	0	0	5	6	2	2	7	8	8	1	47
anonym203	1	1	1	1	1	4	1	1	0	0	4	0	1	0	0	0	0	0	0	5	9	2	2	7	7	7	1	55
anonym204	2	4	8	8	4	5	4	6	8	9	6	6	5	8	9	9	9	2	4	0	7	2	2	9	7	9	2	44
anonym205	1	1	1	3	1	4	1	0	0	0	0	0	0	0	0	0	0	0	0	0	5	2	1	6	6	5	1	50
anonym206	0	0	0	2	0	0	0	0	0	0	0	0	0	0	0	0	0	0	0	0	2	2	2	1	1	3	2	53
anonym207	2	4	9	9	3	3	4	5	7	8	8	7	5	10	10	5	5	4	1	0	7	1	1	8	7	8	2	32
anonym208	1	0	0	2	0	2	0	0	0	0	0	0	0	0	0	0	0	0	0	9	9	2	2	8	8	9	2	73
anonym209	6	5	7	7	6	7	7	7	7	8	5	8	6	8	8	7	7	6	5	4	7	2	2	5	5	7	2	36
anonym210	2	3	8	9	2	3	3	9	10	8	10	10	9	10	10	9	8	6	4	2	9	1	1	9	8	9	2	61
anonym211	1	3	5	6	2	2	4	7	8	8	8	8	3	10	8	5	5	3	3	0	8	2	2	9	7	9	2	29
anonym212	0	1	9	6	1	1	5	7	0	5	7	7	1	10	8	5	5	1	5	0	7	2	2	5	6	9	2	43
anonym213	0	0	0	0	0	1	0	0	0	0	4	4	3	8	8	5	5	5	3	1	9	1	1	8	9	9	2	56
anonym214	1	2	8	9	1	1	2	3	8	10	1	8	1	10	9	5	5	3	1	1	5	1	1	9	8	8	2	43
anonym215	1	4	9	10	7	3	0	0	0	0	0	0	2	10	10	0	0	0	0	3	1	2	2	3	1	1	2	34
anonym216	2	6	8	7	5	4	7	8	10	10	10	8	9	10	9	7	6	5	4	1	8	1	1	9	8	9	2	17
anonym217	2	3	8	10	6	5	7	9	6	6	7	7	7	8	9	7	8	7	7	3	7	2	2	7	5	5	2	39
anonym218	2	2	6	8	4	4	6	8	5	7	6	6	7	8	8	4	4	2	2	1	3	2	2	6	3	5	2	50
anonym219	0	0	0	0	0	0	0	0	0	0	10	0	10	0	1	0	0	0	0	10	5	2	1	7	8	9	2	33
anonym220	2	2	6	6	3	4	3	7	10	10	1	0	6	9	9	7	9	4	3	0	8	1	1	8	9	8	2	16
anonym221	3	5	8	9	4	4	4	8	10	10	4	3	4	4	6	9	10	8	7	0	6	2	2	7	5	7	2	16
anonym222	5	0	0	0	1	0	0	0	0	0	4	0	0	0	0	0	0	0	0	8	8	2	2	9	9	9	2	59
anonym223	2	3	7	9	5	9	8	10	10	10	5	10	9	6	5	8	8	8	10	2	7	2	2	6	2	6	2	66
anonym224	1	1	2	4	1	1	2	4	6	10	7	0	5	3	5	3	4	3	2	1	3	2	2	4	3	3	1	40
anonym225	2	2	9	9	3	3	5	8	8	9	6	6	6	10	9	5	5	3	3	1	5	1	1	5	4	6	2	47
anonym226	3	2	4	8	2	3	5	5	5	10	8	10	2	9	9	8	9	8	5	2	3	2	2	7	5	5	2	30
anonym227	6	6	10	10	7	7	8	8	8	8	5	5	6	10	10	8	8	8	7	5	9	1	1	9	9	9	2	42
anonym228	0	0	0	0	0	9	0	0	0	0	10	0	0	2	0	0	0	0	0	10	4	2	2	3	5	4	1	50
anonym229	2	4	2	8	2	6	6	7	9	9	8	8	2	10	10	7	8	6	3	2	4	2	2	4	4	6	2	43
anonym230	0	0	0	2	0	2	0	0	0	0	2	0	0	0	0	0	0	0	2	8	7	2	1	6	6	7	2	48
anonym231	1	2	8	9	6	4	6	10	10	10	6	10	9	10	9	9	10	7	6	4	9	1	1	8	9	9	2	70
anonym232	0	0	4	5	5	5	0	0	0	0	7	0	0	2	0	0	0	0	2	4	4	2	2	4	3	5	2	51
anonym233	2	3	5	3	1	4	4	5	8	10	1	2	2	4	5	4	4	4	3	0	8	1	1	8	8	9	2	22
anonym234	0	0	0	2	0	3	0	0	0	0	1	0	0	0	0	0	0	0	0	8	4	2	1	7	4	3	2	47
anonym235	2	2	5	5	2	3	3	2	1	1	2	2	2	1	1	0	0	1	4	2	3	2	2	2	1	3	2	56
anonym236	3	5	8	7	4	3	5	8	9	10	4	5	4	5	2	6	7	7	4	2	6	2	2	7	7	8	2	55
anonym237	2	2	1	5	0	0	0	0	0	0	9	5	9	6	5	0	0	0	4	2	3	2	1	3	3	5	2	28
anonym238	1	3	7	8	4	6	6	7	7	7	3	4	7	9	9	7	7	4	6	1	2	2	2	4	1	2	2	37
anonym239	5	8	8	4	7	6	0	0	0	0	5	0	0	5	0	10	10	0	0	0	7	1	2	7	7	9	2	26
anonym240	1	2	8	10	3	5	4	5	6	10	3	4	5	10	10	5	6	3	4	0	9	1	1	9	9	9	2	45
anonym241	0	0	0	0	0	2	0	0	0	0	1	0	0	0	0	0	0	0	0	10	9	2	2	9	9	9	2	43
anonym242	0	0	1	4	1	0	0	8	8	0	8	9	9	7	7	5	5	3	5	0	6	2	2	6	6	8	2	64
anonym243	5	5	8	8	4	7	8	9	10	10	7	8	9	10	10	4	6	3	2	1	6	2	1	7	6	8	1	59
anonym244	1	2	6	9	5	4	6	9	8	9	7	7	1	8	8	9	9	5	2	0	4	2	2	7	4	5	2	40
anonym245	2	1	1	8	1	3	0	2	4	8	6	6	8	4	0	8	8	6	5	2	5	2	2	5	3	5	2	55
anonym246	4	3	6	5	3	2	0	2	3	4	5	3	1	0	0	0	0	0	0	2	4	2	2	7	5	6	2	55
anonym247	3	5	7	10	2	2	3	5	6	7	10	10	2	10	10	2	2	0	4	4	3	2	2	3	2	2	2	43
anonym248	0	0	0	0	0	3	0	0	0	0	0	0	0	0	0	0	0	0	5	0	7	2	1	3	6	7	2	54
anonym249	0	0	0	5	0	8	0	0	1	1	3	1	1	2	1	1	1	0	4	5	1	2	2	3	1	1	2	59
anonym250	0	0	7	7	0	1	5	8	10	10	0	0	0	9	10	9	9	7	5	0	7	2	2	7	7	9	2	51
anonym251	0	0	3	9	0	2	5	9	5	8	3	3	3	9	9	5	5	3	1	0	5	2	2	8	7	7	2	58
anonym252	6	7	8	7	7	8	8	8	8	8	6	8	6	8	8	8	9	7	6	5	5	2	2	4	3	5	2	42
anonym253	2	0	0	8	0	8	0	0	0	0	0	0	6	8	0	0	0	0	10	0	3	2	1	8	1	1	2	48
anonym254	1	2	6	5	1	1	3	8	9	10	8	6	6	9	9	2	3	1	1	0	4	2	2	5	2	6	2	22
anonym255	0	0	0	0	0	0	0	0	0	0	0	0	0	0	0	0	0	0	0	9	9	1	2	8	8	7	1	65
anonym256	5	5	2	7	5	5	6	7	8	8	4	4	3	4	3	1	0	1	2	2	8	2	2	8	8	8	1	74
anonym257	3	3	8	6	1	2	1	6	4	4	0	1	2	7	8	3	3	2	4	0	5	2	2	5	5	6	2	36
anonym258	2	2	10	8	2	2	5	10	8	10	1	8	8	10	10	8	8	6	6	0	3	2	2	8	4	3	2	55
anonym259	0	0	2	5	0	0	0	0	0	0	5	0	3	3	0	0	0	0	7	7	4	2	2	5	5	5	2	71
anonym260	1	1	5	5	1	1	3	7	5	8	1	7	1	8	7	7	9	6	1	1	7	2	2	7	7	6	1	66
anonym261	1	1	0	0	1	2	0	0	0	0	1	0	0	0	0	0	0	0	0	0	9	1	2	9	8	9	1	58
anonym262	2	3	8	9	1	3	6	8	5	9	8	8	8	9	10	3	3	2	5	2	5	2	2	5	4	6	2	55
anonym263	3	3	7	8	3	3	7	7	0	0	3	6	2	7	3	0	6	1	5	9	7	2	1	7	7	5	2	42
anonym264	0	1	0	0	0	1	0	0	0	0	4	2	4	7	8	5	8	3	1	1	7	2	2	9	9	7	2	56
anonym265	8	8	8	9	7	5	7	8	8	8	0	0	1	9	9	7	5	6	7	1	4	2	2	5	3	7	1	31
anonym266	1	1	1	1	1	1	1	5	5	5	7	7	7	2	0	0	0	0	5	0	7	2	1	3	5	6	1	41
anonym267	2	3	8	8	3	2	5	5	10	10	1	2	1	5	6	8	8	7	6	1	4	2	2	6	4	7	2	50
anonym268	3	3	5	7	3	3	3	5	4	7	1	2	2	8	8	5	5	2	3	0	3	2	2	4	4	4	2	32
anonym269	2	1	5	3	1	4	0	1	0	0	4	1	1	1	1	0	0	0	1	3	6	2	2	6	6	7	2	74
anonym270	4	4	8	9	4	4	7	8	8	9	3	5	3	8	8	3	3	4	5	1	4	2	2	5	6	7	2	58
anonym271	4	4	7	7	5	8	6	8	10	10	3	4	5	8	9	5	5	3	4	1	9	2	2	7	5	2	2	38
anonym272	8	5	4	4	3	2	0	0	2	0	2	1	3	6	2	0	2	3	2	8	7	1	2	7	7	6	2	49
anonym273	0	0	0	0	0	0	0	1	0	0	0	1	0	0	0	0	0	0	0	8	9	2	2	7	8	9	2	61
anonym274	3	5	10	10	1	2	3	5	10	10	1	2	3	8	9	10	10	5	8	1	7	2	1	7	7	7	2	65
anonym275	1	2	8	9	2	3	5	8	8	9	9	9	9	10	10	10	10	9	2	0	9	1	1	9	9	9	2	41
anonym276	2	4	9	10	2	5	4	4	10	9	5	6	2	9	9	6	4	3	2	0	4	2	2	7	4	5	2	65
anonym277	1	0	2	1	0	5	0	0	0	0	8	1	1	1	1	0	0	0	2	2	6	2	2	6	6	7	1	71
anonym278	0	2	1	1	0	0	0	0	0	0	9	7	8	1	0	0	0	0	0	10	7	2	2	7	7	7	1	66
anonym279	5	5	8	10	5	6	8	10	10	10	7	7	4	10	10	7	9	7	5	0	8	2	2	8	7	9	2	68
anonym280	2	3	8	9	3	2	8	10	9	10	9	9	9	9	10	6	10	7	8	6	8	2	1	7	7	5	2	66
anonym281	2	2	5	5	4	5	6	8	8	9	8	8	5	1	3	5	5	5	3	3	5	2	2	6	5	5	2	40
anonym282	5	5	10	10	9	8	8	9	10	10	2	5	0	8	8	5	5	5	8	1	8	2	2	7	7	8	2	60
anonym283	5	5	8	8	5	5	7	9	8	9	9	9	9	9	9	9	9	8	7	5	7	2	1	6	6	7	2	57
anonym284	1	2	5	7	2	3	4	8	8	9	3	3	3	7	8	10	10	7	1	0	9	1	1	7	9	9	1	51
anonym285	4	4	8	8	3	4	6	8	5	7	5	7	5	8	7	6	6	5	5	4	7	2	1	6	4	7	2	56
anonym286	2	4	9	9	3	3	7	9	5	9	6	7	7	9	10	8	10	4	6	2	5	2	2	3	3	3	2	57
anonym287	2	5	7	8	5	7	7	8	9	10	6	7	5	6	8	7	7	6	7	1	5	2	1	6	6	7	2	45
anonym288	0	0	1	1	0	1	0	0	0	0	1	0	0	0	0	0	0	0	0	0	8	2	1	8	8	9	2	55
anonym289	0	5	10	10	0	0	10	10	10	10	5	5	2	10	10	5	6	3	9	1	9	1	1	9	8	9	2	53
anonym290	3	3	9	10	3	5	5	9	6	10	6	8	8	10	10	7	8	7	3	0	8	2	1	7	7	8	2	43
anonym291	4	4	8	10	6	8	8	8	9	10	7	8	8	9	9	7	9	9	6	2	6	1	1	4	3	6	2	22
anonym292	3	5	10	10	3	7	5	6	10	10	7	7	8	10	10	8	9	8	10	1	9	1	1	6	7	8	2	34
anonym293	2	2	7	8	3	3	7	9	8	8	2	8	1	9	9	8	8	5	2	0	7	2	1	4	5	7	2	56
anonym294	6	7	8	8	6	6	8	8	9	9	7	7	8	6	8	8	9	6	5	5	8	1	1	7	7	7	2	34
anonym295	1	1	7	5	2	1	4	5	7	8	2	2	2	6	6	7	8	7	4	1	4	2	1	4	4	4	2	40
anonym296	1	1	6	7	2	2	2	8	9	10	8	10	8	10	10	10	10	10	2	3	8	1	1	9	8	8	2	65
anonym297	5	8	10	10	8	5	8	10	8	10	8	10	8	10	10	8	8	6	5	3	4	2	1	5	4	5	2	30
anonym298	3	3	7	8	3	3	5	8	3	7	2	1	1	10	10	8	8	3	3	0	4	2	2	3	3	5	2	38
anonym299	3	4	5	7	5	6	6	7	8	8	9	9	9	9	9	9	9	8	5	4	9	1	1	9	8	9	2	42
anonym300	2	2	6	9	2	2	3	9	8	8	8	8	9	10	10	9	9	7	6	1	9	1	1	9	8	9	2	36
anonym301	4	6	10	9	6	7	7	9	9	9	6	9	4	10	10	8	8	7	6	0	3	2	2	3	1	1	2	53
anonym302	1	5	9	9	4	5	7	9	10	10	8	7	9	9	10	9	9	7	5	2	7	2	2	5	7	8	2	34
anonym303	3	3	6	7	3	3	5	8	10	8	3	4	7	8	9	5	5	5	5	2	9	1	1	9	9	8	2	31
anonym304	7	7	0	10	7	7	7	10	10	10	0	0	1	0	0	10	10	6	7	0	9	1	1	9	8	9	2	50
anonym305	2	2	4	4	2	2	2	4	2	1	0	1	1	7	7	2	2	2	2	0	5	2	2	4	4	6	2	38
anonym306	5	5	8	9	5	5	6	8	9	10	8	8	8	10	10	9	9	8	6	5	8	1	1	8	8	8	2	43
anonym307	7	9	10	10	9	8	10	10	10	10	10	10	8	10	10	10	10	9	8	7	8	2	2	8	8	8	2	60
anonym308	2	2	7	8	3	4	5	9	8	10	3	7	6	10	10	8	10	3	4	1	7	2	2	7	7	7	2	50
anonym309	3	4	9	10	4	4	4	5	7	8	3	7	2	9	9	5	6	5	4	2	7	2	2	9	7	9	2	57
anonym310	2	4	10	10	2	5	9	9	8	9	4	8	8	9	10	8	9	5	4	1	3	2	2	4	3	7	2	71
anonym311	0	1	9	9	1	1	1	8	9	9	7	9	7	10	10	7	7	6	6	0	4	2	2	4	2	3	2	33
anonym312	0	0	0	2	0	0	0	0	0	0	0	0	0	0	0	0	0	0	0	10	7	1	1	9	7	7	2	58
anonym313	2	2	7	7	2	3	4	5	6	6	5	7	8	10	8	5	5	4	3	1	4	2	2	4	3	7	2	39
anonym314	4	4	6	7	4	4	5	6	8	8	7	8	6	6	7	6	6	6	6	3	7	1	1	6	7	7	2	52
anonym315	3	4	7	9	5	7	7	9	10	10	7	7	7	9	9	7	7	6	7	2	7	2	1	7	7	7	2	29
anonym316	3	3	8	10	4	5	8	9	10	10	8	10	10	10	10	10	10	10	9	3	8	1	1	9	8	9	2	70
anonym317	1	1	5	7	3	4	7	7	9	9	8	2	5	1	0	3	5	6	5	5	6	2	1	7	6	6	2	55
anonym318	0	0	0	0	0	0	0	0	9	0	0	0	2	2	1	0	0	1	0	0	9	1	2	8	8	8	2	66
anonym319	0	0	0	1	0	5	0	0	0	0	3	10	0	10	10	0	0	0	0	10	9	2	1	7	8	6	2	58
anonym320	3	4	10	9	4	4	4	8	10	10	2	3	4	9	10	5	6	4	3	0	7	2	1	8	6	7	2	43
anonym321	6	5	2	2	2	2	1	0	1	0	3	5	1	0	1	0	0	0	3	5	6	2	2	5	5	6	2	48
anonym322	0	0	0	4	0	5	0	3	0	0	7	9	9	4	4	0	0	2	0	9	5	2	2	5	7	7	2	72
anonym323	2	4	10	9	3	4	5	6	10	10	8	8	10	10	10	7	8	5	7	4	9	1	1	8	8	9	2	26
anonym324	1	1	7	9	0	2	1	2	4	5	0	2	2	10	10	5	5	1	1	0	9	1	1	8	7	9	2	37
anonym325	2	2	8	8	7	7	7	8	10	5	7	3	9	10	10	10	10	10	8	2	7	2	1	7	7	7	1	74
anonym326	6	6	8	9	6	7	8	9	9	10	8	9	8	10	10	10	10	8	6	3	7	2	2	7	8	8	2	49
anonym327	3	4	9	7	3	3	6	9	10	10	7	8	9	10	10	10	10	10	5	2	7	2	1	8	7	7	1	41
anonym328	3	4	8	9	4	4	5	8	8	8	4	5	6	8	10	9	9	6	4	3	7	1	1	7	8	7	2	41
anonym329	2	3	8	9	6	7	8	9	10	10	8	8	7	10	10	9	9	7	6	2	7	2	2	7	6	7	2	51
anonym330	2	3	7	7	5	5	7	8	7	9	4	10	5	10	10	10	10	8	2	0	1	2	2	3	3	3	2	40
anonym331	4	5	8	9	5	4	7	9	9	10	5	7	8	9	9	9	9	6	8	5	8	2	1	9	8	8	1	57
anonym332	2	1	9	10	2	2	2	9	7	10	6	8	8	10	10	7	7	4	3	0	9	2	2	7	7	7	2	64
anonym333	1	0	1	1	0	1	2	5	2	2	1	10	10	10	10	1	0	0	0	0	7	1	1	7	7	7	2	37
anonym334	1	1	6	8	2	5	5	8	10	10	1	8	1	8	8	1	2	0	1	0	9	2	1	9	9	9	2	56
anonym335	7	7	9	10	7	7	8	10	10	10	10	10	10	8	10	10	10	10	10	5	9	2	1	5	5	5	2	36
anonym336	3	3	7	8	5	6	6	7	10	10	8	8	8	10	10	9	8	6	4	1	7	1	1	7	7	7	2	71
anonym337	8	0	2	0	0	0	0	4	0	0	6	0	0	0	0	0	0	0	6	10	8	2	1	6	7	9	2	28
anonym338	1	1	6	7	3	1	7	8	9	10	10	10	10	10	10	10	10	8	6	0	7	1	1	5	5	5	2	53
anonym339	1	2	7	10	2	6	7	10	10	10	8	9	10	10	10	8	8	6	3	0	7	2	1	6	6	7	2	62
anonym340	1	1	1	3	1	1	3	5	5	9	9	9	9	9	9	5	6	4	4	1	8	1	1	8	7	8	2	54
anonym341	4	4	3	3	4	2	0	0	0	8	9	2	4	1	1	0	0	4	3	3	7	1	1	6	6	7	2	45
anonym342	0	0	2	2	0	6	2	0	0	0	2	0	0	0	0	0	0	0	5	1	3	2	2	5	3	3	2	42
anonym343	2	2	7	6	2	3	3	4	4	5	2	3	1	8	9	7	7	5	3	0	3	2	2	3	2	3	2	51
anonym344	1	1	1	1	1	1	1	1	1	1	1	1	1	1	1	1	1	1	1	1	8	2	2	8	8	8	1	46
anonym345	1	3	8	9	3	3	5	6	9	10	2	5	3	9	10	10	10	8	4	0	7	2	2	7	6	6	2	39
anonym346	0	0	10	10	0	0	7	0	0	0	0	0	0	10	10	0	0	0	0	0	4	2	2	5	5	9	2	60
anonym347	1	0	3	6	1	2	3	6	3	6	0	0	6	0	0	0	1	1	2	2	6	1	1	7	7	7	1	29
anonym348	5	7	9	10	7	7	8	10	10	10	7	9	8	9	9	10	10	8	9	5	5	2	2	6	6	8	2	71
anonym349	3	4	6	8	5	4	5	7	7	8	2	4	5	8	9	6	6	5	4	2	6	2	1	6	4	6	2	21
anonym350	7	8	10	10	8	8	9	9	10	10	7	8	6	9	10	10	10	8	7	1	7	2	1	7	8	9	2	39
anonym351	6	6	9	8	6	8	8	9	10	10	8	8	9	10	10	10	10	8	7	5	3	2	2	6	4	5	2	36
anonym352	2	2	8	8	2	3	5	8	8	10	7	7	8	9	9	9	9	6	3	1	4	2	2	7	7	6	2	65
anonym353	6	6	8	9	8	7	7	9	8	8	7	8	9	10	10	8	9	7	8	3	9	1	1	8	8	8	2	47
anonym354	6	6	9	10	6	7	9	9	10	10	8	8	9	8	7	8	8	8	5	5	8	1	1	9	7	8	1	16
anonym355	4	4	5	5	3	6	5	5	5	4	5	4	3	5	6	4	4	5	6	6	5	2	2	5	7	7	1	39
anonym356	5	5	7	8	7	8	7	7	8	8	5	5	5	8	9	6	6	7	7	5	4	2	2	5	5	5	2	36
anonym357	0	7	8	7	3	2	0	0	0	0	4	0	0	0	0	0	0	0	0	0	6	2	1	6	7	9	2	66
anonym358	1	2	8	10	2	2	3	8	4	6	6	7	8	10	10	8	8	5	4	1	9	1	1	9	8	9	2	36
anonym359	0	1	9	7	1	3	1	4	10	10	0	10	1	10	10	10	10	8	0	0	5	2	1	3	1	7	2	48
anonym360	3	3	5	8	2	3	7	7	6	8	0	7	8	10	10	6	7	3	2	0	8	1	1	8	7	8	1	44
anonym361	2	2	7	9	2	2	6	7	9	10	1	8	3	9	9	9	9	5	2	0	1	2	2	2	1	2	2	45
anonym362	2	1	3	1	1	1	1	1	1	6	2	9	3	5	9	3	4	2	2	0	5	2	2	3	5	5	2	49
anonym363	4	4	10	8	3	2	3	8	10	10	7	10	8	10	10	5	5	5	5	0	8	1	1	9	7	7	2	40
anonym364	2	4	6	8	3	4	7	8	8	8	3	3	3	8	9	4	5	2	3	1	5	1	2	6	4	9	2	48
anonym365	3	6	9	9	7	8	8	9	9	10	9	10	9	10	10	9	9	7	7	3	4	2	1	4	4	3	2	45
anonym366	1	1	6	9	3	4	4	9	9	8	0	4	6	9	10	3	3	6	4	0	5	2	2	6	6	7	2	42
anonym367	6	6	6	3	8	8	7	9	9	10	7	8	8	7	9	8	8	7	9	4	5	1	1	5	6	7	2	24
anonym368	0	1	6	8	2	6	7	9	10	10	8	9	1	10	9	8	9	7	6	0	9	1	1	9	9	9	2	58
anonym369	1	2	10	10	2	4	6	7	9	10	7	10	5	10	10	8	9	8	7	1	9	1	1	9	9	9	2	29
anonym370	6	8	8	6	0	3	0	0	0	0	9	3	4	4	0	0	0	0	4	0	4	2	2	5	5	5	2	57
anonym371	1	0	0	1	0	7	0	0	0	0	0	0	9	0	0	0	0	0	0	8	8	2	2	7	7	8	2	43
anonym372	4	5	9	8	5	7	8	8	6	8	5	6	7	8	8	7	7	6	5	3	5	2	2	5	3	3	2	38
anonym373	8	8	10	10	8	8	8	10	8	8	10	10	10	10	10	8	8	8	8	8	5	2	2	6	6	6	2	50
anonym374	4	4	8	9	4	4	5	9	9	10	9	9	10	10	10	10	10	8	4	1	7	2	1	6	6	7	2	47
anonym375	0	0	7	7	0	0	1	7	5	6	5	7	0	9	9	2	2	1	1	0	5	2	1	5	6	7	2	49
anonym376	0	1	2	0	0	1	0	10	8	0	10	7	8	10	10	10	10	10	7	1	5	2	2	5	7	7	2	60
anonym377	8	8	10	10	7	8	8	8	7	10	3	10	7	10	10	8	8	6	8	0	9	1	1	8	8	9	2	39
anonym378	5	7	8	8	5	10	9	9	7	8	8	8	8	10	6	10	8	8	8	6	5	2	2	6	7	3	2	71
anonym379	2	3	5	3	6	6	7	7	5	1	1	3	2	5	2	5	5	3	2	1	5	2	1	4	4	3	1	64
anonym380	3	6	9	10	4	7	8	10	2	10	2	3	5	7	8	1	0	0	1	5	9	2	1	9	9	9	2	56
anonym381	6	6	10	9	6	6	8	9	10	10	8	10	7	10	10	9	9	8	9	6	9	2	2	9	7	7	2	65
anonym382	3	4	8	10	4	4	7	8	9	10	10	10	7	10	10	10	10	8	8	1	4	2	1	3	3	3	1	52
anonym383	0	0	1	3	1	1	3	4	5	5	5	7	3	8	8	8	8	5	2	0	7	2	1	7	6	7	2	53
anonym384	6	6	8	9	6	6	9	10	8	8	6	6	4	10	10	9	9	8	4	4	8	2	2	4	3	6	2	52
anonym385	1	1	3	4	2	4	2	5	2	7	1	1	1	5	5	2	2	2	2	1	4	2	1	4	4	5	2	42
anonym386	1	1	2	2	2	2	2	2	2	2	2	2	2	4	4	4	4	4	2	0	8	2	1	8	7	8	2	64
anonym387	4	4	9	10	5	8	8	10	7	10	3	8	8	5	6	6	8	4	4	3	7	2	2	5	3	4	2	53
anonym388	5	5	8	9	6	4	6	9	10	6	5	8	7	10	10	7	8	7	6	3	9	2	2	8	8	8	2	56
anonym389	4	4	9	10	5	6	5	8	10	10	8	8	6	10	10	6	7	5	4	1	5	2	2	7	3	7	2	72
anonym390	6	6	5	8	6	7	7	8	9	10	7	7	7	7	6	8	9	7	7	0	6	2	2	6	4	4	1	40
anonym391	2	5	10	9	3	3	6	8	10	10	6	7	3	3	1	7	8	5	4	0	7	1	1	9	7	8	2	42
anonym392	3	4	9	9	3	7	7	9	8	8	2	7	7	9	9	4	5	4	7	0	8	1	1	7	7	6	2	37
anonym393	1	1	2	4	1	3	0	0	0	0	0	7	3	7	5	0	0	0	4	8	3	2	2	5	3	3	2	58
anonym394	1	7	10	7	5	10	10	8	10	9	1	10	5	10	0	6	10	7	8	1	7	2	2	9	9	8	2	52
anonym395	0	0	3	5	0	3	3	6	8	6	7	8	7	8	7	9	9	7	5	3	6	2	2	5	5	5	2	61
anonym396	5	5	9	10	6	6	6	9	10	10	7	9	10	10	10	9	9	8	6	7	5	2	2	7	6	5	2	43
anonym397	2	3	9	9	2	2	2	8	5	6	5	5	7	10	10	8	8	7	6	1	5	1	1	5	5	7	2	42
anonym398	7	3	0	0	0	0	0	0	0	0	0	0	0	0	0	0	0	0	0	10	8	2	1	7	8	8	2	69
anonym399	6	3	3	7	2	2	7	7	2	8	7	7	6	8	8	9	10	8	8	1	8	1	1	9	8	9	2	52
anonym400	1	1	6	6	1	2	2	5	5	10	7	5	5	9	9	9	9	5	3	0	5	2	2	7	3	4	2	43
anonym401	2	2	8	5	2	2	2	3	8	10	5	5	5	2	2	2	5	5	2	2	7	1	2	7	7	9	2	59
anonym402	2	6	1	7	3	3	7	8	6	8	1	6	4	1	1	9	9	9	4	4	5	2	1	5	3	3	2	64
anonym403	2	2	7	7	2	5	5	10	9	10	9	9	9	10	10	10	10	7	5	2	5	2	2	5	5	7	2	57
anonym404	4	7	9	8	8	8	7	8	10	10	8	9	10	10	9	10	10	8	8	5	7	2	1	8	8	8	1	67
anonym405	0	8	5	1	0	2	0	0	0	0	0	0	0	0	0	0	0	0	0	0	9	1	2	9	9	8	2	80
anonym406	7	7	9	8	7	7	8	10	10	10	8	7	7	9	9	10	10	10	6	5	7	1	1	8	7	8	2	38
anonym407	3	4	8	9	3	3	6	6	6	6	4	3	6	7	6	4	4	4	4	2	9	1	1	9	9	9	1	57
anonym408	7	8	10	10	5	6	8	4	10	10	6	7	7	9	10	7	9	7	5	2	7	2	1	7	7	7	2	18
anonym409	4	4	6	8	6	5	7	9	4	3	8	7	7	5	4	9	9	8	7	4	7	2	2	7	7	7	1	66
anonym410	1	2	2	1	2	1	2	1	1	1	2	2	2	1	2	1	1	1	1	9	5	2	2	5	7	5	2	54
anonym411	0	0	0	0	0	1	0	0	0	0	7	10	9	10	10	9	9	8	8	1	8	1	1	7	8	9	1	47
anonym412	0	0	0	6	6	6	0	0	0	0	10	10	10	0	0	0	0	0	6	4	4	2	2	5	5	9	1	27
anonym413	2	2	5	2	3	3	1	1	0	0	9	4	0	7	3	0	0	0	1	6	7	1	1	5	6	8	2	16
anonym414	7	7	9	10	7	8	9	10	9	10	8	8	3	8	8	7	7	6	8	3	5	2	1	5	5	5	2	50
anonym415	1	1	9	10	3	3	5	8	5	10	3	6	9	1	0	10	10	5	4	0	8	1	1	9	8	9	2	69
anonym416	7	4	3	0	0	5	0	0	0	0	8	3	2	6	6	0	0	0	2	8	4	2	2	8	5	7	2	55
anonym417	0	3	8	9	5	5	5	9	9	10	5	8	9	10	10	9	9	8	3	0	9	1	1	7	8	9	2	80
anonym418	2	2	5	4	3	3	5	7	8	9	5	6	6	7	7	9	10	7	3	0	3	2	2	7	5	7	1	74
anonym419	2	3	10	9	3	3	8	9	10	10	2	5	1	10	10	8	8	7	3	0	7	2	1	8	7	5	2	44
anonym420	0	0	1	5	0	9	0	0	0	0	3	0	1	3	0	0	0	0	4	6	5	2	2	5	5	7	2	70
anonym421	7	8	9	9	8	8	8	9	10	10	8	9	10	10	10	10	10	9	8	7	9	2	1	9	9	9	2	74
anonym422	1	1	6	8	3	7	7	8	10	8	7	9	6	4	1	8	9	6	6	1	3	2	2	5	5	5	2	65
anonym423	0	0	0	0	0	2	0	0	0	0	1	0	0	0	0	0	0	0	0	0	9	1	1	7	7	7	1	72
anonym424	6	6	8	9	6	6	7	8	9	10	6	7	6	9	9	10	10	8	6	5	9	2	2	9	9	9	2	52
anonym425	0	0	1	3	0	0	2	6	4	7	2	2	4	5	7	6	7	5	1	0	8	2	1	8	8	9	2	63
anonym426	1	2	8	9	3	4	7	8	9	10	8	10	4	10	10	3	3	2	3	0	4	2	2	4	5	5	2	63
anonym427	9	5	9	10	2	3	5	9	7	7	4	6	7	9	8	5	5	8	6	1	5	2	2	3	4	3	2	68
anonym428	2	2	3	3	3	4	5	8	9	10	3	3	3	1	1	5	7	6	4	1	7	2	2	6	6	9	2	38
anonym429	4	4	5	6	4	3	4	6	7	7	6	5	5	5	6	6	7	5	3	1	8	2	2	8	7	8	2	60
anonym430	0	0	0	8	8	4	8	9	9	9	7	8	7	5	4	8	8	8	8	4	7	2	2	5	6	7	2	68
anonym431	6	6	8	8	6	7	8	7	10	10	8	8	8	10	10	10	10	8	7	3	8	2	1	8	8	8	2	64
anonym432	2	2	3	6	5	7	4	2	1	1	7	3	4	4	4	2	4	3	3	5	4	2	1	4	3	3	2	61
anonym433	9	9	9	9	9	9	9	9	7	6	7	7	5	8	9	8	9	6	6	9	3	2	2	2	2	3	1	47
anonym434	0	0	0	0	0	1	0	0	0	0	0	0	0	1	0	0	0	0	0	0	5	1	1	5	5	7	2	60
anonym435	2	2	6	7	4	3	4	7	7	8	9	9	8	9	9	9	9	7	7	3	9	2	1	8	8	9	2	62
anonym436	1	1	1	1	0	2	0	0	0	0	7	7	7	0	0	0	2	2	2	0	8	2	1	6	6	8	2	69
anonym437	0	0	0	0	0	0	0	0	0	0	3	0	0	0	0	0	0	0	0	0	5	2	2	5	5	7	1	72
anonym438	0	0	0	0	0	0	0	2	0	0	0	1	2	2	2	2	2	2	2	0	6	2	2	7	7	8	2	67
anonym439	2	3	6	10	9	8	9	10	10	10	8	8	5	9	9	10	9	8	8	3	7	2	2	7	7	7	2	57
anonym440	2	2	4	7	2	3	7	9	10	10	7	9	4	10	9	4	4	2	1	0	8	2	2	8	8	9	2	65
anonym441	2	2	3	7	3	3	4	6	8	10	4	4	7	9	8	6	7	7	2	1	3	2	2	4	3	3	2	58
anonym442	0	2	3	4	0	8	0	0	0	0	0	1	0	0	0	0	0	0	0	10	5	2	2	5	3	7	2	51
anonym443	1	0	0	0	0	1	0	0	0	0	0	0	0	0	0	0	0	0	0	9	8	2	1	8	8	9	2	57
anonym444	0	0	3	8	1	1	3	10	10	10	5	5	5	8	10	10	10	7	2	0	5	2	1	5	5	5	1	72
anonym445	0	0	1	1	0	1	0	0	0	0	2	0	0	0	0	0	0	0	0	1	7	2	1	7	6	7	1	75
anonym446	2	4	6	2	0	2	0	0	0	0	0	0	0	0	0	0	0	0	0	8	6	2	1	5	5	7	2	68
anonym447	0	1	6	6	1	2	2	2	3	3	4	4	5	6	4	3	3	3	3	0	4	2	2	7	7	7	2	49
anonym448	1	1	0	1	0	1	0	1	0	0	1	0	0	0	0	0	0	0	0	1	8	2	2	9	7	9	2	67
anonym449	5	5	8	9	7	6	7	9	10	8	6	7	4	8	8	0	8	5	6	7	7	2	1	4	3	4	1	81
anonym450	0	0	0	1	0	0	0	0	0	0	8	6	4	5	2	0	0	0	1	9	7	2	1	7	7	7	2	39
anonym451	1	1	7	10	3	2	8	9	2	0	3	6	2	10	10	3	2	7	1	0	9	1	1	9	9	9	2	61
anonym452	1	1	6	6	3	5	6	7	8	10	6	7	7	9	9	9	10	8	6	1	8	2	1	8	8	9	1	73
anonym453	0	0	0	0	0	0	0	0	0	0	0	0	0	0	0	0	0	0	0	0	9	1	1	9	9	9	2	58
anonym454	7	8	8	5	6	5	7	8	4	8	8	8	7	4	4	6	7	8	8	5	7	2	2	7	7	8	1	67
anonym455	2	1	5	7	4	8	5	6	10	10	8	9	6	8	7	9	9	9	9	2	4	2	2	4	4	6	1	65
anonym456	2	2	6	8	7	7	7	8	9	9	7	8	9	9	9	8	8	6	5	3	4	2	2	5	4	5	2	67
anonym457	1	1	6	7	1	1	3	4	5	5	1	8	5	10	10	4	4	2	2	2	1	2	2	1	1	2	2	39
anonym458	1	1	2	4	1	3	2	2	2	2	4	4	3	8	8	3	3	2	2	1	4	2	2	7	6	7	2	33
anonym459	3	3	10	8	3	3	4	7	9	10	3	7	5	9	10	9	9	7	6	5	6	2	2	7	6	8	2	69
anonym460	1	3	5	5	0	7	0	0	0	0	0	0	0	0	0	0	0	0	4	7	4	2	2	6	3	6	2	61
anonym461	2	6	10	10	10	10	10	10	10	10	10	10	10	10	10	10	10	10	10	1	4	2	2	7	6	7	2	52
anonym462	3	3	4	3	4	3	4	3	1	3	3	4	3	3	0	0	0	0	2	9	8	2	2	7	8	8	2	68
anonym463	1	2	9	10	1	1	5	9	9	9	9	9	5	10	10	5	5	2	5	0	8	2	2	8	8	8	2	51
anonym464	6	6	9	9	7	5	6	8	10	5	8	9	9	9	9	8	8	8	7	0	9	2	2	8	8	8	1	56
anonym465	1	0	0	0	0	0	0	0	0	0	10	0	0	2	1	0	0	0	0	9	9	2	1	9	9	9	2	63
anonym466	1	1	3	6	2	3	7	8	9	9	5	4	3	3	3	5	5	2	3	2	4	2	2	4	5	7	1	55
anonym467	0	3	2	4	0	5	0	0	0	0	0	0	0	2	0	0	0	0	2	1	5	2	1	7	7	7	1	72
anonym468	0	0	0	0	0	0	0	0	0	0	0	0	0	0	0	0	0	0	0	0	7	2	2	7	7	9	2	69
anonym469	0	0	4	3	0	1	0	0	0	0	1	0	0	0	0	0	0	0	1	1	5	2	1	7	7	7	1	80
anonym470	0	0	0	3	0	0	0	0	0	0	0	0	0	0	0	0	0	0	2	8	8	2	1	8	7	8	1	67
anonym471	1	1	1	0	0	1	0	0	0	0	8	0	0	0	0	0	0	0	0	1	8	2	2	8	6	9	2	44
anonym472	2	2	6	7	2	2	4	8	9	10	8	10	9	10	10	9	9	7	8	2	5	2	1	5	4	3	2	61
anonym473	2	3	6	8	7	7	8	8	9	7	6	7	5	7	8	7	7	8	6	5	7	2	1	7	6	7	1	81
anonym474	2	4	8	7	5	6	7	9	8	9	4	3	5	8	7	8	10	7	5	1	7	2	1	6	7	7	1	72
anonym475	0	0	0	0	0	3	0	0	0	0	1	0	0	0	0	0	0	0	0	10	9	2	2	7	8	9	2	68
anonym476	7	8	10	10	7	9	9	9	10	10	5	6	8	10	10	9	9	8	8	4	7	2	1	7	7	9	2	72
anonym477	1	2	8	10	3	5	6	6	10	10	5	7	7	8	9	8	8	8	6	1	7	2	2	8	6	8	2	65
anonym478	2	2	8	8	2	2	8	9	10	10	8	8	8	10	10	10	10	10	10	0	4	1	2	7	4	6	2	51
anonym479	0	0	4	7	2	5	7	9	9	9	0	2	0	2	2	4	4	4	4	0	7	2	1	7	7	7	2	57
anonym480	0	0	0	0	0	0	0	0	0	0	4	0	0	0	0	0	0	0	0	0	4	2	2	3	2	2	2	64
anonym481	0	0	0	2	0	2	2	3	3	0	3	2	3	0	0	0	0	0	0	3	9	2	2	9	8	9	2	66
anonym482	2	2	6	8	7	7	6	6	6	7	6	6	7	2	2	6	8	3	6	1	9	2	2	9	8	8	2	50
anonym483	1	1	1	1	1	1	0	0	0	0	1	0	0	1	0	0	0	0	0	0	7	2	2	6	6	6	2	54
anonym484	4	3	1	1	0	5	0	0	0	0	0	0	0	0	0	0	0	0	0	8	8	2	1	7	8	8	1	71
anonym485	1	1	7	9	2	3	5	5	8	10	9	9	9	10	10	8	9	8	7	3	7	2	1	7	7	8	2	62
anonym486	5	2	3	6	4	3	7	9	8	9	10	9	8	5	5	9	5	2	2	0	5	2	1	7	7	7	2	70
anonym487	0	1	1	0	0	0	0	0	0	0	2	0	0	0	0	0	0	0	0	9	7	2	2	7	7	7	2	74
anonym488	0	0	0	0	0	0	0	0	0	0	0	0	0	0	0	0	0	0	0	7	5	2	2	5	7	9	2	77
anonym489	3	3	3	7	3	7	2	1	1	0	0	0	1	1	0	0	0	0	4	5	3	2	1	7	4	6	1	58
anonym490	2	2	0	6	0	4	2	2	2	1	1	1	7	0	0	0	0	2	2	1	5	2	1	3	3	4	1	58
anonym491	2	3	7	4	3	2	4	5	3	8	1	1	1	7	7	6	8	4	1	0	6	2	1	5	4	5	1	35
anonym492	0	0	0	0	0	0	0	0	0	0	4	0	0	0	0	0	0	0	0	9	7	2	2	7	6	9	2	74
anonym493	2	5	8	9	6	6	6	8	8	9	9	9	7	10	10	7	8	6	7	2	8	1	1	7	7	9	2	56
anonym494	0	0	3	0	0	1	0	0	0	1	0	0	0	0	0	0	0	0	1	10	5	2	2	8	5	6	2	66
anonym495	4	5	8	8	7	7	7	8	9	10	3	5	7	7	7	7	7	7	7	5	7	2	2	6	7	7	2	79
anonym496	3	3	3	2	0	5	0	0	0	0	0	0	0	0	0	0	0	0	0	3	5	2	2	5	7	9	2	64
anonym497	1	1	1	2	2	2	2	2	10	9	2	2	3	7	10	8	9	6	5	1	7	2	2	8	5	9	2	72
anonym498	2	0	6	6	0	7	0	0	0	0	0	0	0	1	7	0	0	0	7	3	3	2	2	5	5	5	2	52
anonym499	1	2	4	7	2	3	4	7	8	9	2	3	2	8	8	7	7	4	3	0	7	1	1	8	6	9	2	43
anonym500	0	0	0	0	0	2	0	0	0	0	2	0	2	0	0	0	0	0	0	10	8	2	1	7	8	8	2	63
anonym501	0	0	0	5	0	9	0	0	0	0	5	0	0	3	3	0	0	0	9	3	3	2	2	4	3	3	2	64
anonym502	0	0	0	2	0	3	0	0	0	0	2	0	0	0	0	0	0	0	0	7	7	2	2	7	5	5	1	65
anonym503	2	3	7	10	1	3	6	10	10	1	6	8	5	8	9	3	3	1	3	0	7	1	1	6	7	6	2	49
anonym504	1	1	1	1	1	1	1	0	0	0	0	0	0	0	0	0	0	0	0	0	8	1	2	8	9	9	2	76
anonym505	6	6	9	10	6	4	8	9	10	10	4	8	9	10	9	10	10	8	5	2	8	2	1	9	7	9	2	70
anonym506	1	1	0	2	0	4	0	0	0	0	2	0	0	0	0	0	0	0	0	9	7	2	2	8	8	9	2	67
anonym507	3	5	9	10	5	8	8	10	10	10	10	10	8	10	10	10	10	9	7	3	7	2	1	7	9	8	2	64
anonym508	0	1	0	1	0	0	0	0	0	0	0	0	0	0	0	0	0	0	0	1	5	2	2	5	4	8	2	59
anonym509	3	3	8	10	3	5	10	10	10	10	4	4	4	9	10	10	10	8	5	1	9	1	2	9	9	8	2	80
anonym510	8	9	7	5	0	4	0	0	0	0	2	5	1	9	2	0	0	0	6	1	3	2	2	4	3	3	2	67
anonym511	4	4	8	8	6	5	9	9	9	10	6	8	7	3	3	8	9	9	9	4	7	2	2	5	5	9	2	71
anonym512	4	2	2	1	2	2	1	1	0	0	2	2	2	2	2	1	0	0	1	2	7	2	1	7	8	9	2	65
anonym513	2	4	2	3	0	3	0	0	0	0	2	2	4	1	1	0	0	0	1	5	7	2	1	7	7	7	2	74
anonym514	0	0	0	0	0	0	0	0	0	0	5	0	0	1	1	0	0	0	0	5	7	2	2	5	5	6	2	70
anonym515	0	0	0	1	0	2	0	8	9	1	8	9	8	2	1	9	8	9	7	1	8	2	2	8	7	9	1	75
anonym516	2	2	1	1	0	2	0	1	0	0	5	3	2	4	4	0	0	0	0	7	3	2	2	1	3	5	2	74
anonym517	0	0	0	0	0	0	0	0	0	0	6	7	9	9	10	6	6	6	5	4	9	2	1	7	8	9	2	46
anonym518	5	4	8	7	4	4	7	8	8	10	8	8	6	9	10	9	9	8	5	0	7	2	2	7	7	8	2	68
anonym519	2	2	5	7	3	4	3	5	5	8	7	9	7	10	10	10	10	5	2	1	4	2	2	4	4	5	2	72
anonym520	3	2	7	8	3	5	5	5	8	9	4	7	7	10	10	8	8	6	1	0	9	1	1	6	7	7	2	47
anonym521	3	3	5	5	6	6	8	8	8	9	6	7	8	8	8	9	9	5	4	2	9	2	2	7	7	7	2	62
anonym522	3	4	6	7	4	5	6	7	8	9	6	7	6	8	8	6	7	5	5	1	7	2	2	5	6	6	2	31
anonym523	1	1	6	6	1	1	1	5	9	10	3	9	4	4	6	6	8	5	3	1	9	1	2	8	8	8	1	75
anonym524	1	0	3	8	0	1	1	3	2	9	9	9	7	4	4	4	5	4	8	0	3	2	2	4	3	5	2	53
anonym525	3	3	4	9	3	4	7	9	8	8	7	7	7	4	3	6	9	8	6	3	5	2	1	5	5	5	2	67
anonym526	3	5	8	8	7	8	9	9	10	10	6	6	5	7	9	10	10	8	7	1	8	2	1	8	8	8	2	70
anonym527	1	1	5	6	1	2	2	3	4	4	1	1	1	4	4	3	3	4	3	1	5	2	1	7	6	9	2	69
anonym528	1	1	3	3	1	4	0	1	0	0	2	0	1	1	0	0	0	0	0	5	5	2	2	5	7	9	1	63
anonym529	0	0	3	6	1	2	2	2	8	9	5	8	8	1	5	4	5	2	1	0	7	1	1	7	6	7	2	66
anonym530	1	3	9	10	1	1	3	8	6	9	9	9	6	9	9	9	9	5	7	0	8	2	2	8	7	7	2	55
anonym531	1	3	6	9	1	6	5	8	9	10	7	9	9	9	6	5	6	4	4	2	8	2	2	6	4	4	2	17
anonym532	2	3	2	2	2	4	1	2	1	4	7	8	6	3	2	3	3	2	3	0	8	2	1	8	8	9	1	68
anonym533	1	5	9	9	7	8	9	10	10	10	9	9	9	10	10	8	8	6	6	1	8	2	1	8	9	9	2	56
anonym534	0	0	0	0	0	4	0	0	0	0	0	0	5	0	0	0	0	0	0	9	7	2	1	8	6	8	2	76
anonym535	0	0	2	5	1	4	4	9	5	10	10	8	8	2	2	10	10	3	3	0	7	2	1	7	7	8	1	56
anonym536	1	1	8	10	1	5	8	5	8	10	1	3	2	5	7	8	9	4	1	0	8	2	1	9	8	9	2	68
anonym537	2	1	0	2	0	0	0	0	0	0	0	0	0	0	0	0	0	0	0	0	7	2	1	7	5	7	2	64
anonym538	0	2	8	9	2	3	7	9	9	9	3	8	7	0	0	0	0	0	2	0	8	2	2	8	8	9	2	62
anonym539	0	0	8	7	0	1	1	3	3	5	3	6	3	8	8	4	5	7	2	0	5	2	2	5	5	7	2	60
anonym540	0	0	6	4	0	1	1	5	5	7	1	2	2	8	8	6	8	5	1	0	8	2	1	8	6	7	2	58
anonym541	1	3	9	9	5	8	9	9	9	10	10	10	10	10	10	10	10	10	10	1	5	2	2	6	4	7	2	52
anonym542	0	0	1	3	0	1	2	5	10	10	10	2	2	2	2	10	10	8	2	0	5	2	2	4	4	4	2	66
anonym543	5	5	7	8	6	6	7	8	9	10	9	8	7	9	10	10	10	8	7	5	5	2	1	6	6	7	2	47
anonym544	1	2	1	1	1	2	1	1	1	1	8	9	9	9	8	8	10	7	6	1	7	2	1	7	6	8	2	67
anonym545	0	0	2	0	0	0	0	0	0	0	0	0	0	0	0	0	0	0	0	9	8	1	2	8	9	9	1	59
anonym546	0	3	8	8	1	2	6	8	8	9	8	8	2	8	8	7	7	7	3	0	7	1	1	7	4	7	2	63
anonym547	4	4	9	10	6	8	9	10	10	10	4	4	7	10	10	8	9	7	7	5	7	1	1	8	8	9	2	54
anonym548	2	3	8	6	2	3	3	8	5	7	1	1	1	9	8	6	7	3	5	0	7	1	1	7	6	8	2	37
anonym549	0	0	0	6	0	8	0	0	0	0	0	0	0	7	4	0	0	0	0	0	5	2	2	4	4	4	2	36
anonym550	4	4	9	9	3	4	8	9	9	10	3	4	4	9	9	9	10	9	7	4	9	1	1	9	9	9	2	68
anonym551	3	3	9	7	2	5	9	10	6	8	5	3	4	7	8	5	6	3	3	0	4	2	1	3	3	4	1	52
anonym552	1	1	0	0	0	0	0	0	0	0	0	0	0	0	0	0	0	0	1	5	8	1	1	7	8	9	1	67
anonym553	0	0	0	0	0	0	0	0	0	0	2	0	0	0	0	0	0	0	0	8	9	1	2	9	9	9	2	60
anonym554	0	0	0	3	0	1	0	0	0	0	3	0	2	0	0	0	0	0	0	7	5	2	2	6	4	8	1	67
anonym555	4	6	9	10	3	7	8	9	10	10	7	8	9	10	10	4	5	3	5	2	8	2	2	7	6	8	2	34
anonym556	3	3	6	8	3	3	5	7	7	10	8	10	9	10	10	10	10	8	3	0	8	1	2	9	8	9	2	67
anonym557	0	0	0	2	0	1	0	0	0	0	0	0	0	0	0	0	0	0	0	1	5	2	2	5	5	7	2	80
anonym558	1	1	7	4	1	2	2	5	3	4	8	4	2	4	6	2	2	2	3	0	4	2	2	6	3	7	1	56
anonym559	2	5	8	8	3	4	8	8	10	10	7	9	8	10	10	10	10	9	7	2	3	2	2	4	4	7	2	74
anonym560	0	0	0	1	0	2	0	0	0	0	3	9	7	0	0	0	0	0	0	9	8	2	1	8	8	8	2	75
anonym561	2	1	0	0	0	1	0	0	0	0	0	0	0	0	0	0	0	0	0	10	9	1	1	9	9	9	2	61
anonym562	3	4	8	9	4	4	5	7	9	10	7	6	8	9	10	10	9	7	4	1	8	1	2	8	8	8	2	76
anonym563	6	6	9	9	6	6	6	8	10	10	7	8	7	10	10	8	8	7	7	5	7	1	2	5	6	7	2	43
anonym564	3	3	7	8	3	4	6	9	9	9	9	9	5	5	7	9	9	9	6	1	9	1	1	9	8	9	2	68
anonym565	3	3	8	5	1	8	1	1	0	0	1	0	1	1	1	0	0	0	2	1	6	2	1	5	5	6	1	76
anonym566	0	0	0	7	0	1	0	1	9	9	10	10	10	10	10	9	10	9	8	1	3	2	1	4	3	4	2	61
anonym567	3	3	7	7	3	3	5	8	6	9	3	5	3	8	9	9	9	8	2	2	7	2	2	8	7	7	2	62
anonym568	2	2	6	8	3	5	5	7	6	6	5	6	6	8	8	5	7	4	5	7	9	1	2	8	8	8	2	35
anonym569	1	2	7	8	1	1	1	3	4	5	5	7	8	9	9	5	5	4	2	1	9	1	1	8	9	8	2	65
anonym570	1	1	1	1	1	2	1	0	0	0	0	0	1	0	0	0	0	0	0	9	8	1	1	8	9	9	1	73
anonym571	1	2	10	7	1	2	8	10	10	10	10	10	5	7	10	10	10	10	5	0	9	1	1	9	9	8	2	74
anonym572	2	2	5	8	5	8	7	9	10	10	5	7	7	10	10	8	8	8	7	3	5	1	2	7	5	5	2	68
anonym573	0	0	7	7	3	3	7	9	10	10	2	3	2	2	3	4	6	4	3	0	8	1	2	8	8	8	2	68
anonym574	1	4	9	8	5	4	6	8	9	9	5	7	8	10	10	6	7	6	3	2	5	2	2	9	5	9	2	57
anonym575	0	1	5	6	2	2	2	6	8	9	3	3	1	8	9	5	7	6	3	0	7	2	1	8	8	8	1	54
anonym576	8	6	4	4	7	7	8	9	4	9	2	2	3	3	4	3	3	4	8	2	9	1	1	8	8	8	1	28
anonym577	3	6	8	8	6	7	6	9	9	10	9	10	8	4	3	8	10	9	4	1	7	1	2	6	4	4	2	74
anonym578	5	7	8	8	9	8	9	9	9	9	8	8	7	8	8	10	10	8	6	2	5	2	2	4	3	7	1	57
anonym579	0	0	0	4	0	0	4	8	6	10	0	10	5	0	0	5	5	0	0	0	8	2	1	7	7	9	2	57
anonym580	5	5	7	7	0	8	0	0	0	0	0	0	0	0	0	0	0	0	3	0	3	2	2	3	3	3	1	60
anonym581	5	5	8	8	5	7	6	8	10	10	8	10	10	6	5	10	10	10	6	0	9	2	1	9	8	9	2	66
anonym582	3	4	8	9	6	7	8	9	9	10	2	3	1	4	5	3	5	3	2	0	8	2	1	8	8	7	2	67
anonym583	2	3	6	5	4	3	4	7	5	7	3	3	3	4	6	6	6	6	7	3	7	2	2	7	8	8	2	59
anonym584	3	2	1	3	0	0	0	0	0	0	4	0	4	5	5	0	0	0	2	6	5	2	1	4	5	5	2	64
anonym585	1	1	8	8	1	3	8	8	9	10	8	9	5	10	10	10	10	7	3	1	7	2	2	7	5	7	1	68
anonym586	2	2	5	7	4	4	5	8	9	10	4	6	8	9	9	10	10	8	2	1	7	2	1	8	7	7	1	61
anonym587	5	5	9	9	4	4	6	8	10	10	3	8	3	10	10	8	8	9	7	3	8	1	1	8	8	9	2	75
anonym588	3	3	10	9	4	3	3	9	9	10	8	10	9	10	10	9	10	8	7	3	7	2	1	6	5	8	2	60
anonym589	1	1	7	8	7	7	7	8	2	9	8	8	8	8	8	2	2	2	0	5	7	2	1	7	6	7	2	49
anonym590	1	2	0	4	0	4	0	0	0	0	0	0	0	0	0	0	0	0	3	3	3	2	2	5	3	7	2	37
anonym591	5	7	10	8	7	6	5	10	10	8	0	5	5	10	10	0	0	10	5	0	8	2	2	9	8	9	2	66
anonym592	0	1	2	1	0	4	0	0	0	0	1	0	5	1	0	0	0	0	0	8	6	2	2	5	4	5	2	69
anonym593	2	2	6	9	3	4	5	9	10	10	4	4	6	7	10	5	6	3	3	0	6	2	2	8	6	9	2	58
anonym594	2	2	3	8	2	8	0	1	0	0	0	0	4	9	2	0	0	1	0	4	1	2	2	2	1	1	2	53
anonym595	2	2	2	3	1	2	3	6	8	8	6	6	2	6	6	8	8	6	3	1	1	2	2	2	1	1	2	67
anonym596	0	2	7	8	1	1	6	8	8	8	10	10	10	10	10	10	10	8	7	0	5	2	1	7	4	4	2	63
anonym597	2	2	9	9	3	4	5	8	5	7	8	9	10	10	10	10	10	7	6	1	2	2	2	5	3	3	2	50
anonym598	1	2	9	10	1	3	6	9	10	10	3	6	7	10	10	10	10	9	3	0	8	2	2	8	8	9	2	60
anonym599	1	1	1	1	1	1	1	1	1	1	1	1	1	1	1	1	1	1	1	8	5	1	1	5	5	7	1	70
anonym600	1	1	1	2	0	1	0	0	0	1	4	6	6	8	8	7	8	8	6	3	8	2	2	7	8	7	2	72
anonym601	6	6	8	9	6	6	6	8	9	10	10	10	4	10	10	7	7	6	6	1	6	2	2	6	6	8	2	30
anonym602	3	5	6	10	7	7	7	7	10	10	9	9	9	9	9	10	10	10	8	3	3	2	2	7	2	2	2	69
anonym603	3	3	8	9	3	7	7	8	8	8	7	7	7	10	10	7	7	5	6	3	4	2	2	5	2	3	2	47
anonym604	1	3	8	10	5	7	9	8	9	9	4	4	3	9	10	5	6	7	9	1	5	2	2	5	3	4	2	68
anonym605	1	2	5	7	2	2	3	7	10	10	1	3	3	8	8	7	7	6	2	0	1	2	2	1	1	1	2	42
anonym606	8	8	10	8	7	7	9	10	7	10	5	7	7	10	10	10	10	7	7	3	4	2	2	4	4	3	1	59
anonym607	7	8	10	7	7	8	8	10	9	10	0	0	1	8	9	8	9	3	1	0	5	2	2	5	4	6	2	52
anonym608	0	0	7	10	5	5	5	8	10	10	7	7	6	9	10	9	9	6	2	0	7	2	1	7	6	7	2	60
anonym609	0	0	9	10	3	4	2	8	7	9	8	7	3	9	10	8	9	5	3	0	7	2	2	6	7	8	2	60
anonym610	3	4	9	6	4	6	7	8	6	9	5	5	4	8	8	3	3	2	4	0	8	2	2	8	8	9	2	39
anonym611	3	2	2	2	3	4	0	0	0	0	0	0	0	0	0	0	0	0	0	9	5	2	2	5	5	7	2	76
anonym612	4	4	8	9	4	4	6	7	8	8	8	8	6	9	8	6	6	8	7	4	6	2	2	7	6	6	2	41
anonym613	1	1	0	1	0	4	0	0	0	0	1	0	1	1	1	0	0	0	3	7	5	2	2	5	3	6	2	65
anonym614	0	0	2	5	0	0	1	3	5	7	3	3	3	6	6	6	6	3	1	1	5	1	1	7	5	8	2	78
anonym615	5	7	10	10	7	7	10	10	10	10	7	7	7	10	10	7	7	3	3	0	3	2	1	3	3	3	1	55
anonym616	5	0	0	0	0	4	0	0	0	0	5	0	0	0	0	0	0	0	0	9	5	1	2	8	5	9	2	63
anonym617	3	3	7	8	3	3	3	8	8	10	7	9	9	4	8	9	9	7	5	3	7	2	2	7	7	8	2	28
anonym618	1	1	9	9	1	1	3	7	8	9	8	8	2	5	5	5	5	3	3	1	5	2	1	5	5	6	2	68
anonym619	2	2	5	8	2	2	3	9	9	9	4	2	2	7	8	9	9	6	2	0	7	2	1	7	5	6	2	48
anonym620	3	3	5	7	5	7	6	8	8	10	8	8	8	9	9	10	10	8	6	4	7	2	2	6	6	7	1	66
anonym621	0	0	0	3	0	1	3	5	0	0	1	1	1	0	0	0	1	0	2	0	5	2	1	5	3	8	1	59
anonym622	0	0	0	2	0	0	0	0	0	0	0	0	0	0	0	0	0	0	2	0	7	2	1	7	6	8	2	71
anonym623	3	4	7	7	7	8	9	9	9	10	8	9	8	10	10	9	9	9	8	4	4	2	2	3	3	4	2	73
anonym624	1	2	6	6	5	7	0	0	1	0	5	1	5	0	1	0	0	0	0	5	5	2	2	6	6	6	2	66
anonym625	6	6	8	7	2	8	5	8	7	0	5	9	9	9	9	6	7	3	6	2	5	2	2	5	3	5	2	60
anonym626	3	3	8	8	3	3	4	6	9	10	8	8	9	10	10	10	10	8	4	1	9	1	1	9	9	9	2	55
anonym627	1	0	0	7	0	0	0	0	0	0	0	0	0	0	0	0	0	0	0	9	7	2	2	6	4	4	2	43
anonym628	0	0	0	4	0	3	3	5	5	10	5	5	2	2	2	5	10	2	2	0	4	2	2	4	4	3	2	80
anonym629	2	2	4	4	2	2	3	3	7	8	3	4	1	7	8	3	3	4	3	1	4	2	2	6	5	7	2	60
anonym630	4	4	7	8	3	5	4	7	7	9	4	3	3	10	10	7	7	5	5	0	7	1	1	6	8	9	2	56
anonym631	7	7	9	10	7	7	8	9	10	10	9	10	10	10	10	9	9	9	8	5	6	2	2	4	4	7	2	50
anonym632	7	8	8	9	7	8	7	8	9	10	5	5	5	9	9	10	10	9	8	3	7	1	1	7	7	7	1	71
anonym633	0	1	3	4	1	3	3	4	1	2	1	4	2	8	9	1	1	0	1	0	5	2	1	4	7	3	2	43
anonym634	3	3	7	9	5	8	4	7	10	10	10	10	10	10	10	7	7	7	5	0	4	2	2	7	4	5	2	44
anonym635	2	2	6	9	1	2	2	7	9	10	8	9	10	9	7	10	9	7	5	2	4	2	2	5	5	6	2	52
anonym636	0	0	0	0	0	0	0	0	0	0	0	0	0	0	0	0	0	0	0	0	9	2	1	9	9	8	1	46
anonym637	3	2	2	2	4	4	7	7	8	8	7	8	6	8	8	5	5	8	7	5	4	2	2	4	4	4	2	72
anonym638	2	2	2	0	0	0	0	0	0	0	1	2	1	8	9	1	1	2	2	0	9	2	1	6	5	4	2	61
anonym639	5	5	7	8	7	7	9	9	10	10	7	7	8	8	8	10	10	8	8	7	6	2	2	7	7	6	2	85
anonym640	2	2	2	2	2	3	0	0	0	0	2	0	0	0	0	0	0	0	0	8	8	2	1	7	7	8	1	69
anonym641	2	2	4	8	2	5	7	10	10	10	6	8	8	8	3	10	10	8	4	3	3	2	2	3	3	3	2	70
anonym642	2	5	2	2	4	2	1	6	0	0	2	2	4	0	0	0	0	0	2	8	7	2	1	7	7	7	2	49
anonym643	3	3	3	2	2	5	0	1	0	0	1	1	2	2	2	0	0	1	3	0	7	1	1	8	7	8	1	72
anonym644	0	0	4	5	0	0	6	8	10	10	8	8	8	3	3	8	9	9	8	0	8	2	1	5	3	7	2	74
anonym645	1	3	7	8	1	1	5	8	5	6	4	6	2	0	1	6	6	3	1	1	9	1	1	6	7	9	2	52
anonym646	0	1	0	0	0	5	0	0	0	0	3	0	0	0	0	0	0	0	0	8	8	2	1	8	7	9	2	57
anonym647	0	0	0	0	1	2	0	6	6	8	10	10	10	10	10	10	10	8	7	1	7	2	1	5	5	3	2	58
anonym648	8	1	7	7	1	5	0	1	2	6	6	6	6	6	6	9	9	8	10	6	3	2	2	5	4	6	1	84
anonym649	1	2	9	8	2	2	3	7	9	9	3	5	4	9	9	6	6	4	3	2	3	2	2	4	3	3	2	64
anonym650	0	0	0	6	0	6	2	0	0	0	10	0	3	3	1	0	0	0	2	0	3	2	1	4	5	5	2	28
anonym651	0	0	1	1	0	0	0	0	0	0	0	0	0	0	0	0	0	0	0	0	5	2	2	5	5	8	2	51
anonym652	1	1	8	10	1	3	3	4	7	8	5	6	5	8	10	6	6	6	6	2	7	2	2	7	6	4	2	64
anonym653	3	2	1	3	1	5	1	1	1	0	9	4	2	2	2	0	0	0	0	9	6	2	2	7	7	7	2	78
anonym654	3	3	8	7	3	3	4	8	8	9	8	7	4	7	8	7	7	5	2	0	8	2	2	8	8	9	2	62
anonym655	2	2	8	8	3	4	9	9	8	10	1	2	2	5	9	7	7	6	6	0	7	2	1	7	8	7	2	37
anonym656	9	8	4	4	8	7	8	10	9	9	7	9	9	10	10	8	8	7	6	3	7	2	1	7	7	7	2	68
anonym657	1	2	7	7	2	2	3	9	8	10	1	2	2	7	8	8	10	3	3	1	5	2	1	6	6	7	2	23
anonym658	1	1	9	6	3	5	9	9	9	5	9	0	0	0	0	0	0	0	0	9	9	1	2	9	8	9	2	59
anonym659	1	1	2	5	4	5	7	6	10	3	8	8	8	10	10	10	10	9	5	0	5	1	1	7	7	7	2	67
anonym660	2	2	1	1	2	1	1	1	1	0	1	1	1	1	1	0	0	0	0	10	7	2	1	7	7	7	2	49
anonym661	5	3	0	1	0	3	0	0	0	0	4	0	2	1	0	0	0	0	0	9	6	2	1	6	5	7	2	64
anonym662	3	4	6	6	5	6	5	7	7	8	7	7	7	8	8	7	7	6	7	4	1	2	2	1	1	2	2	53
anonym663	8	7	5	3	3	3	0	0	0	0	4	4	4	4	4	0	0	0	0	9	8	1	1	7	7	9	2	65
anonym664	6	4	8	9	3	4	4	6	7	5	3	4	5	7	7	5	6	4	4	1	4	2	2	4	3	3	2	52
anonym665	3	3	3	3	3	3	3	3	1	1	3	3	3	3	3	3	3	3	3	3	5	1	2	5	3	5	1	44
anonym666	1	2	9	10	4	4	7	9	9	9	8	9	8	10	10	7	7	6	8	0	8	2	2	8	8	8	2	49
anonym667	2	2	5	7	2	3	5	7	6	6	5	5	5	10	10	5	5	5	5	5	3	2	2	5	3	7	2	64
anonym668	2	2	4	5	2	4	8	9	9	10	10	10	9	10	10	10	10	9	6	0	7	2	2	6	6	6	2	55
anonym669	5	0	0	0	0	1	0	0	0	0	0	0	0	0	0	0	0	0	0	0	8	2	2	7	9	9	2	48
anonym670	1	3	6	7	6	6	6	8	9	9	9	9	9	10	10	8	8	7	8	0	8	2	1	8	8	9	1	60
anonym671	2	1	0	3	1	8	0	0	0	0	2	0	0	2	2	0	0	0	3	7	7	2	2	5	5	8	2	54
anonym672	6	6	7	7	6	6	8	9	8	9	8	8	8	9	9	7	8	7	6	4	6	2	2	6	5	7	2	45
anonym673	0	0	0	5	0	8	0	0	0	0	4	1	2	3	2	0	0	0	1	5	4	2	2	5	3	5	2	80
